# Supplementary material
Source: PubMed Central journal article supplement (PMC2660725)
Supplement: 0811648106_0811648106SI.pdf [file 0811648106_0811648106SI.pdf]

# Supporting Information

Tao et al. 10.1073/pnas.0811648106

## Materials and Methods

**Antibodies.** The commercially available antibodies used are as followed: Mouse monoclonal M2 anti-flag antibody (Sigma), rabbit polyclonal anti-HA antibody (Abcam), mouse monoclonal GAPDH antibody (Abcam), mouse monoclonal actin antibody (Sigma), mouse monoclonal phospho-serine 133- CREB antibody (Cell Signaling), mouse monoclonal CaMK IV antibody (BD transduction), rabbit polyclonal CaMK II antibodies (Santa Cruz, Cell Signaling), mouse monoclonal NeuN antibody (Abcam).

**Generation and Initial Analysis of the *Mecp2*<sup>S80A</sup> and *Mecp2*<sup>S421A;S424A</sup> Mice.** A 5.5-kb SpeI genomic fragment containing part of intron 2, exon 3, intron 3 and exon 4 of the *Mecp2* locus was cloned into pBluescript ( $\approx$ 3-kb backbone); a T to G point mutation was introduced in exon 3 by PCR based mutagenesis to change serine 80 to alanine; and a floxed STOP cassette ( $\approx$ 2.9 kb) containing the neomycin resistance gene was cloned into intron 2 to make the targeting construct ( $\approx$ 11 kb). The targeting construct was linearized and electroporated into mouse ES cells. G418 resistant colonies were picked and expanded for genomic DNA extraction. Southern blot analysis was performed using these genomic DNA samples to examine homologous recombination on both the 5' and 3' arms to identify correctly targeted clones. At least 2 correctly targeted ES cell lines were injected into blastocysts to generate chimeric mice. The chimeric mice were crossed with C57/B6 to obtain germ-line transmission of the LSL-*Mecp2*<sup>S80A</sup> allele. The LSL-*Mecp2*<sup>S80A</sup> mice were then crossed with mice carrying a transgenic Cre recombinase allele with germ-line activity to generate *Mecp2*<sup>S80A</sup> mice. DNA and RNA were extracted from the brains of *Mecp2*<sup>S80A</sup> mice and their wild type littermates. RNA samples were reverse transcribed into cDNA. PCR reactions were performed using primers designed to specifically amplify the coding region of the *Mecp2* gene that encodes serine 80. Direct sequencing of the PCR or RT-PCR products confirmed the S80A mutation in the *Mecp2*<sup>S80A</sup> mice. Western blot analysis using S80 specific antibody was used to confirm the absence of phosphorylation at this site in the *Mecp2*<sup>S80A</sup> mice. Since our mass spectrometry results identified both S421 and S424 phosphorylated in epileptic mouse brains and it was not clear which site was more important at the time we were designing these experiments, we decided to replace both serines with alanines to make a *Mecp2*<sup>S421A;S424A</sup> mouse. The same strategy and experimental approach used to generate and validate the *Mecp2*<sup>S80A</sup> mouse were adopted to make the *Mecp2*<sup>S421A;S424A</sup> mouse.

To test the locomotor function, total dark cycle running wheel activities were recorded in a wheel-running cage connected with a Minicounter (Opto-Varimax-MiniA, Columbus Instruments). For each measurement, a mouse was placed at least 3 h before the starting time into a standard laboratory mouse cage with fresh bedding. Recording started at the time when the lights were normally turned off (19:00 Eastern Standard Time) and stopped at 8:00 the next morning, 1 h after the lights normally came back on.

**Plasmids.** N-terminal flag-tagged MECP2 human  $\beta$  (e2) form was cloned into pcDNA3.1. C-terminal flag or HA-tagged MeCP2 mouse  $\alpha$  (e1) form was cloned into FUIGW lentiviral vector (45) under the control of the ubiquitin promoter. MeCP2 mutants were generated with the Quickchange Site-Directed Mutagenesis Kit (Stratagene).

**Cell Culture, Transfection, and Lentiviral Infection.** Cortical neurons from E14 or E15 CD1 mice were cultured on polyornithine (Sigma) and fibronectin (GIBCO) coated dishes in Basal Medium Eagle (Sigma) containing 5% FBS, penicillin, streptomycin, glutamine and B27 serum free supplement (Invitrogen). Plasmids or prevalidated SMARTPOOL siRNA (Dharmacon) were electroporated into neurons using Mouse Neuron Nucleofector Kit (Amaxa) with 30% to 50% transfection efficiency. Lentiviruses were produced using the 3<sup>rd</sup> generation packaging systems as described (Science gateway protocols). E14 or E15 mice cortical neurons were infected with lentiviruses 24 h after dissection and plating. 72–80 h after infection, neurons were treated with drugs and protein/RNA samples were collected.

**Seizure Inducement.** Eight-week-old male mice (Balb-c) or Long-Evance male rats were given 3 intraperitoneal (i.p.) doses of kainic acid (Sigma–Aldrich, 10 mg/kg body weight) to induce seizure. After 4 h of seizure activity animals were killed. Cortices were quickly removed on dry ice, snap frozen and stored at -80 °C before further experiments.

**Immunoblotting.** Standard Western blot was performed as described in ref. 46 with modifications. Nuclear extracts were prepared following manufacturer's instructions (Pierce). Whole cell lysates were prepared using SDS lysis buffer (1% SDS, 10 mM EDTA, 50 mM Tris-HCl, pH 8.1) supplemented with protease inhibitor cocktails (Roche), 1 mM PMSF, 1 mM DTT, 50 mM NaF and 1 mM Na<sub>3</sub>VO<sub>4</sub>. The lysates were immediately pulse sonicated using a microtip (Branson sonifier 450) to break the viscosity caused by chromatin released during the process. Protein concentrations were measured using the BSA Protein Assay Kit (Pierce). The lysates were loaded with SDS sample buffer and size-separated with 8% SDS/PAGE using the 20-cm Protean II xi cell (Bio-Rad) or 10% SDS/PAGE with NuPAGE (Invitrogen). Primary antibodies used were as described in the antibodies section. Secondary goat anti-mouse or anti-rabbit IgG-horseradish antibodies (CalBiochem) were used, and detection was performed using the ECL plus chemiluminescence system (PerkinElmer) on X-Omat Blue films (Kodak). Densitometry analysis was done with Quantity One (Bio-Rad).

**Lambda Phosphatase Treatment.** Whole cell lysates were harvested in 0.7% Nonidet P-40 lysis buffer (50 mM Tris-HCl, pH 8.0, 0.1 mM EDTA, 250 mM NaCl, 10% glycerol) supplemented with protease inhibitors cocktails (Roche) but not any phosphatase inhibitors. Phosphatase treatment was immediately performed following manufacturer's instructions (NEB).

**Drugs.** To inhibit basal neuronal activity, 0.5  $\mu$ M tetrodotoxin (TTX, Sigma) was applied in the culture medium. 5  $\mu$ M KN62 (Calbiochem) was used to inhibit CaM Kinases. 5  $\mu$ M nimodipine (Calbiochem) was an L-type Ca<sup>2+</sup> channel blocker.

**Chromatin Immunoprecipitation.** Chromatin immunoprecipitation was performed similar as Magna ChIP protocol from Upstate Biotechnologies with modifications. Cortical neurons were cross-linked with 1% formaldehyde for 10 min at room temperature. 0.125M glycine was added at the end of reaction. After 2 washes with cold PBS, cells were lysed with SDS lysis buffer (1% SDS, 10 mM EDTA, 50 mM Tris-HCl, pH 8.1) supplemented with protease inhibitor cocktails (Roche), 1 mM PMSF, 1 mM DTT, 50 mM NaF and 1 mM Na<sub>3</sub>VO<sub>4</sub>. Cell lysates were







Mouse normal brain

MVAGMLGLREEK**SEDQDLQGLRDKPLKFKKAKDKKEDKEGKHEPLQPSAHHSAEPAEAGKAETSESSGS**  
 APAVPEASASPKQRSIIIRDRGPMYDDPTLPEGWTRKLRKQKSGRSAGKYDVYLINPQGKAFRSKVELIA  
 YFEKVGDTSLDPNDFDFTVTGRGSPSRREQPPKPKSPKAPGTGRGRGRPKGSGTGRPKAAASEGVQVK  
 RVLEKSPGKLVVKMPFQASPGGKGE~~GGG~~GATTSAQVMVIKRPGRKRKAEADPQAIPKRGKPGSVAAAA  
 AEAKKAVK**ESSIRSVHETVLP**IKKRKTRET**VSIEVKEVVKPLL**VSTLGEKSGKGLK**TCKSPGRKSK**ESS  
 PKGRSS**SASSPPK**KEHHHHHHHSEST**KAPM**LL**SPPPPE**PE**SS**ED**PISPP**EP**QDLSS**ICKEEKMPRGG  
 SLESDGCPKEPAKT**QPMVATTTTVAEKY**KHRGEGERK**DIVSSM**PRPNREEPVDSRTPVTERV**S**

Mouse seized brain lower band

MVAGMLGLREEK**SEDQDLQGLRDKPLKFKKAKDKKEDKEGKHEPLQPSAHHSAEPAEAGKAETSESSGS**  
 APAVPEASASPKQRSIIIRDRGPMYDDPTLPEGWTRKLRKQKSGRSAGKYDVYLINPQGKAFRSKVELIA  
 YFEKVGDTSLDPNDFDFTVTGRGSPSRREQPPKPKSPKAPGTGRGRGRPKGSGTGRPKAAASEGVQVK  
 RVLEKSPGKLVVKMPFQASPGGKGE~~GGG~~GATTSAQVMVIKRPGRKRKAEADPQAIPKRGKPGSVAAAA  
 AEAKKAVK**ESSIRSVHETVLP**IKKRKTRET**VSIEVKEVVKPLL**VSTLGEKSGKGLK**TCKSPGRKSK**ESS  
 PKGRSS**SASSPPK**KEHHHHHHHSEST**KAPM**LL**SPPPPE**PE**SS**ED**PISPP**EP**QDLSS**ICKEEKMPRGG  
 SLESDGCPKEPAKT**QPMVATTTTVAEKY**KHRGEGERK**DIVSSM**PRPNREEPVDSRTPVTERV**S**

Mouse seized brain upper band

MVAGMLGLREEK**SEDQDLQGLRDKPLKFKKAKDKKEDKEGKHEPLQPSAHHSAEPAEAGKAETSESSGS**  
 APAVPEASASPKQRSIIIRDRGPMYDDPTLPEGWTRKLRKQKSGRSAGKYDVYLINPQGKAFRSKVELIA  
 YFEKVGDTSLDPNDFDFTVTGRGSPSRREQPPKPKSPKAPGTGRGRGRPKGSGTGRPKAAASEGVQVK  
 RVLEKSPGKLVVKMPFQASPGGKGE~~GGG~~GATTSAQVMVIKRPGRKRKAEADPQAIPKRGKPGSVAAAA  
 AEAKKAVK**ESSIRSVHETVLP**IKKRKTRET**VSIEVKEVVKPLL**VSTLGEKSGKGLK**TCKSPGRKSK**ESS  
 PKGRSS**SASSPPK**KEHHHHHHHSEST**KAPM**LL**SPPPPE**PE**SS**ED**PISPP**EP**QDLSS**ICKEEKMPRGG  
 SLESDGCPKEPAKT**QPMVATTTTVAEKY**KHRGEGERK**DIVSSM**PRPNREEPVDSRTPVTERV**S**

Rat normal brain

MVAGMLGLREEK**SEDQDLQGLKEKPLKFKKVKDKKEDKEGKHEPLQPSAHHSAEPAEAGKAETSESSGS**  
 APAVPEASASPKQRSIIIRDRGPMYDDPTLPEGWTRKLRKQKSGRSAGKYDVYLINPQGKAFRSKVELIA  
 YFEKVGDTSLDPNDFDFTVTGRGSPSRREQPPKPKSPKAPGTGRGRGRPKGSGTGRPKAAASEGVQVK  
 RVLEKSPGKLLVKMPFQASPGGKGE~~GGG~~GATTSAQVMVIKRPGRKRKAEADPQAIPKRGKPGSVAAAA  
 AEAKKAVK**ESSIRSVQETVLP**IKKRKTRET**VSIEVKEVVKPLL**VSTLGEKSGKGLK**TCKSPGRKSK**ESS  
 PKGRSS**SASSPPK**KEHHHHHHHAESP**KAPM**LL**PPPPPE**PQ**SS**ED**PISPP**EP**QDLSS**ICKEEKMPRAG  
 SLESDGCPKEPAKT**QPMVAAAATTTTTTTTTTVAEKY**KHRGEGERK**DIVSSM**PRPNREEPVDSRTPVTER  
 VS

Rat seized brain lower band

MVAGMLGLREEK**SEDQDLQGLKEKPLKFKKVKDKKEDKEGKHEPLQPSAHHSAEPAEAGKAETSESSGS**  
 APAVPEASASPKQRSIIIRDRGPMYDDPTLPEGWTRKLRKQKSGRSAGKYDVYLINPQGKAFRSKVELIA  
 YFEKVGDTSLDPNDFDFTVTGRGSPSRREQPPKPKSPKAPGTGRGRGRPKGSGTGRPKAAASEGVQVK  
 RVLEKSPGKLLVKMPFQASPGGKGE~~GGG~~GATTSAQVMVIKRPGRKRKAEADPQAIPKRGKPGSVAAAA  
 AEAKKAVK**ESSIRSVQETVLP**IKKRKTRET**VSIEVKEVVKPLL**VSTLGEKSGKGLK**TCKSPGRKSK**ESS  
 PKGRSS**SASSPPK**KEHHHHHHHAESP**KAPM**LL**PPPPPE**PQ**SS**ED**PISPP**EP**QDLSS**ICKEEKMPRAG  
 SLESDGCPKEPAKT**QPMVAAAATTTTTTTTTTVAEKY**KHRGEGERK**DIVSSM**PRPNREEPVDSRTPVTER  
 VS

Rat seized brain upper band

MVAGMLGFREEK**SEDQDLQGLKEKPLKFKKVKDKKEDKEGKHEPLQPSAHHSAEPAEAGKAETSESSGS**  
 APAVPEASASPKQRSIIIRDRGPMYDDPTLPEGWTRKLRKQKSGRSAGKYDVYLINPQGKAFRSKVELIA  
 YFEKVGDTSLDPNDFDFTVTGRGSPSRREQPPKPKSPKAPGTGRGRGRPKGSGTGRPKAAASEGVQVK  
 RVLEKSPGKLLVKMPFQASPGGKGE~~GGG~~GATTSAQVMVIKRPGRKRKAEADPQAIPKRGKPGSVAAAA  
 AEAKKAVK**ESSIRSVQETVLP**IKKRKTRET**VSIEVKEVVKPLL**VSTLGEKSGKGLK**TCKSPGRKSK**ESS  
 PKGRSS**SASSPPK**KEHHHHHHHAESP**KAPM**LL**PPPPPE**PQ**SS**ED**PISPP**EP**QDLSS**ICKEEKMPRAG  
 SLESDGCPKEPAKT**QPMVAAAATTTTTTTTTTVAEKY**KHRGEGERK**DIVSSM**PRPNREEPVDSRTPVTER  
 VS

Fig. S2. Mass spectrometry coverage chart with identified peptides shaded in red.

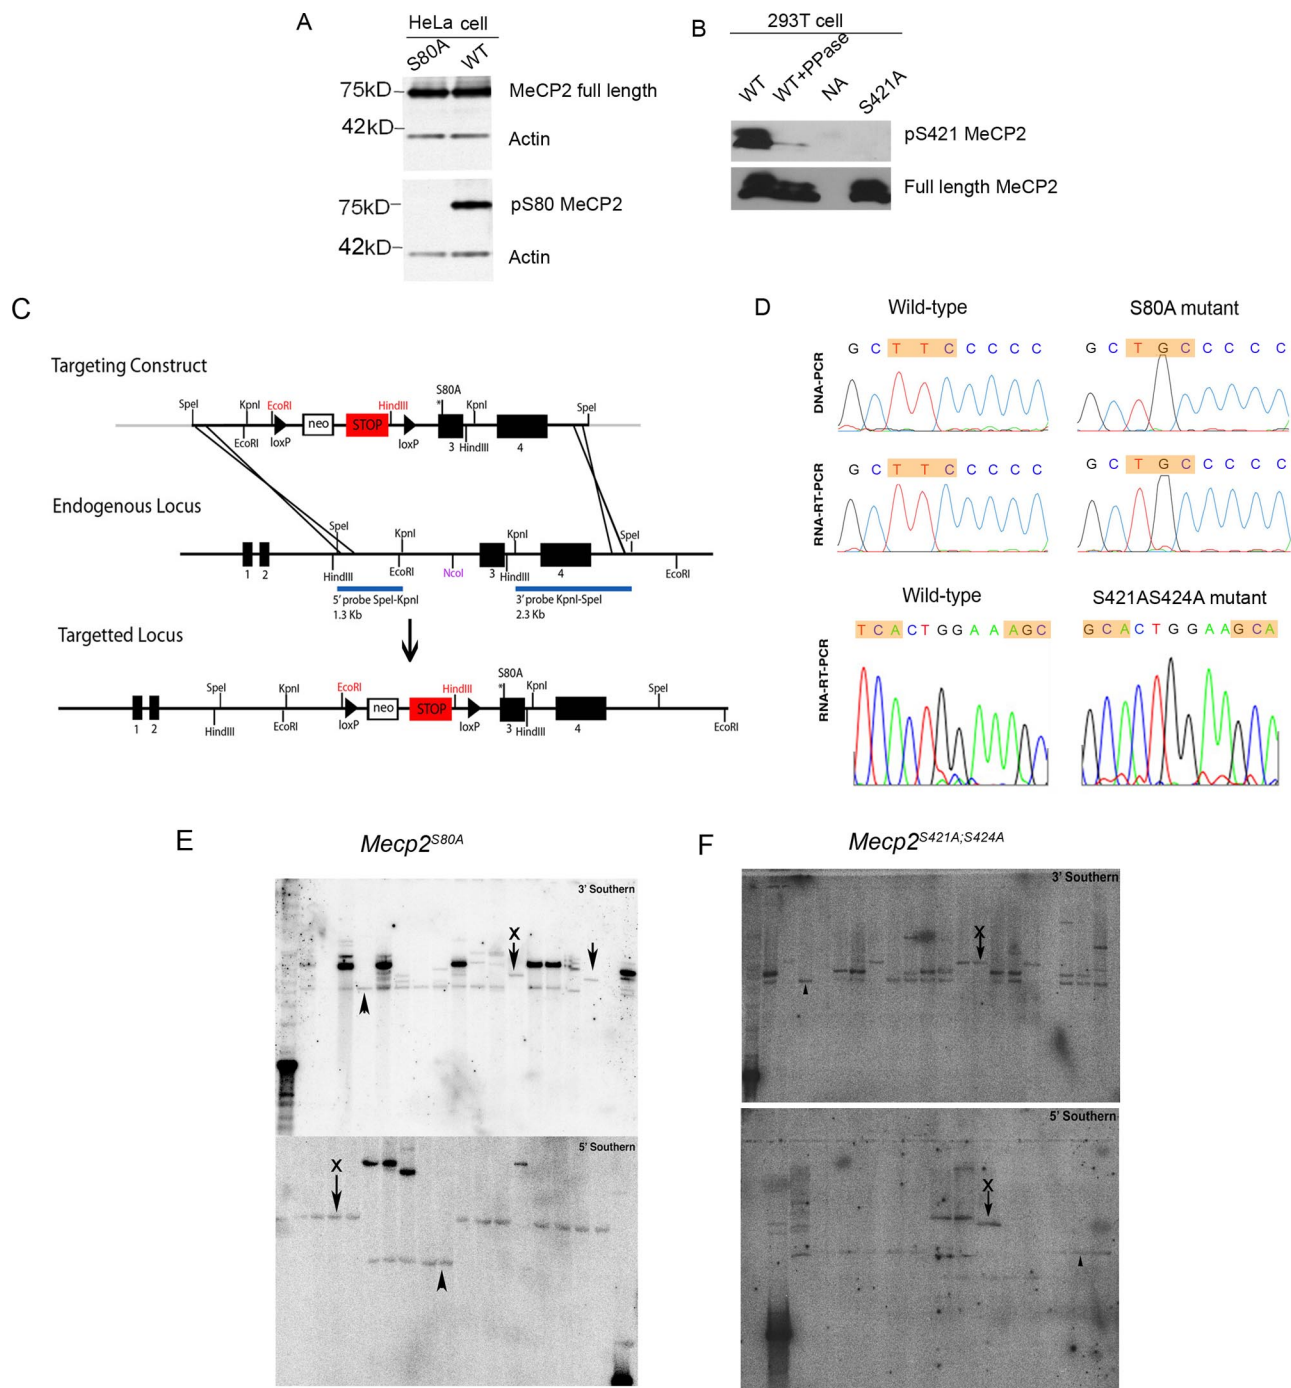

**Fig. 53.** Characterization of MeCP2 serine 80, serine 421 phospho-specific antibodies and *Mecp2*<sup>S80A</sup> and *Mecp2*<sup>S421A/S424A</sup> knock-in mice. (A) Wild-type and S80A MeCP2 were transfected into HeLa cells that expressed a very low level of endogenous MeCP2. Western blot with phospho-S80 antibody recognized the band of wild type protein but not the S80A mutant. The same membrane was stripped and blotted with full length MeCP2 antibody afterward. (B) Wild-type and S421A MeCP2 were transfected into 293T cells that had a low level of endogenous MeCP2. Phospho-S421 antibody detected doublet bands of wild-type MeCP2 that were sensitive to phosphatase treatment, but failed to detect any band in S421A MeCP2. It is possible that 293T cells may have different posttranslational modifications of MeCP2 as both phospho-S421 and full length MeCP2 antibodies detected doublet bands at basal level. (C) Illustration of the targeting strategy for making an LSL-*Mecp2*<sup>S80A</sup> allele. Grey sections on the targeting construct indicate sequence of plasmid origin. Restriction sites in red are on the stop cassette. (D) Sequencing results from genomic DNA and RNA level confirm the successful engineering of the serine 80 to alanine mutation in the *Mecp2*<sup>S80A</sup> mouse brain and the serine 421 and serine 424 to alanine mutation in the *Mecp2*<sup>S421A;S424A</sup> mouse brain. (E and F) Southern blot analysis to identify ES cell clones that are correctly targeted at the endogenous *Mecp2* locus. On top is the Southern blot analysis of the 3' arm of the endogenous *Mecp2* locus; at the bottom is the Southern blot analysis of the 5' arm of the locus. Arrowheads indicate the wild type *Mecp2* alleles. Arrows indicate the LSL-*Mecp2*<sup>S80A</sup> alleles (E) or the LSL-*Mecp2*<sup>S421A/S424A</sup> alleles (F). X indicates the same ES cell clone that is correct on both the 3' and 5' arms. In either the wild-type clones or the correctly targeted clone, only 1 band (allele) is seen, because the *Mecp2* gene is located on the X chromosome and the parental ES cell line is male and has only 1 X chromosome.

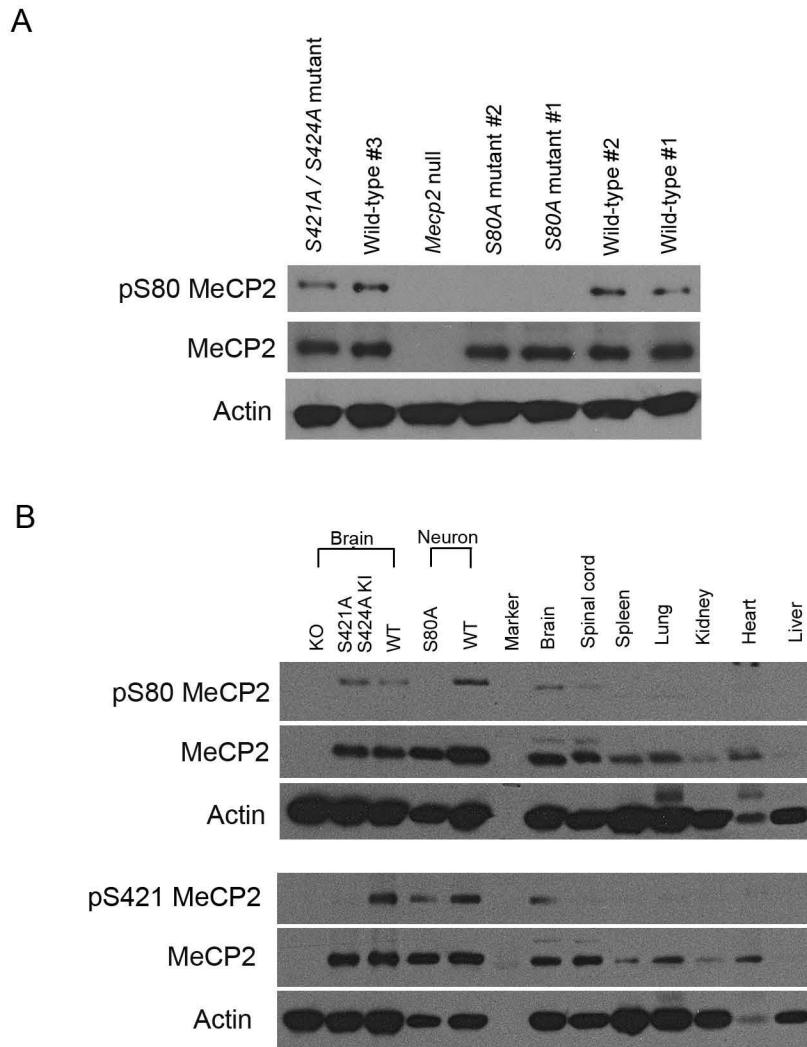

**Fig. S4.** (A) MeCP2 protein expression levels from brain extracts of *Mecp2<sup>S80A</sup>*, *Mecp2<sup>S421A/S424A</sup>* and their wild-type littermates are similar. *Mecp2<sup>S80A</sup>* (#1,#2) and wild type littermate (#1, #2) were 5 months old. *Mecp2<sup>S421A/S424A</sup>* and its wild type litter mate (#3) were 3 months old. (B) Expression levels of MeCP2 and its phosphorylated forms in various tissues isolated from 3-month-old wild type mice.



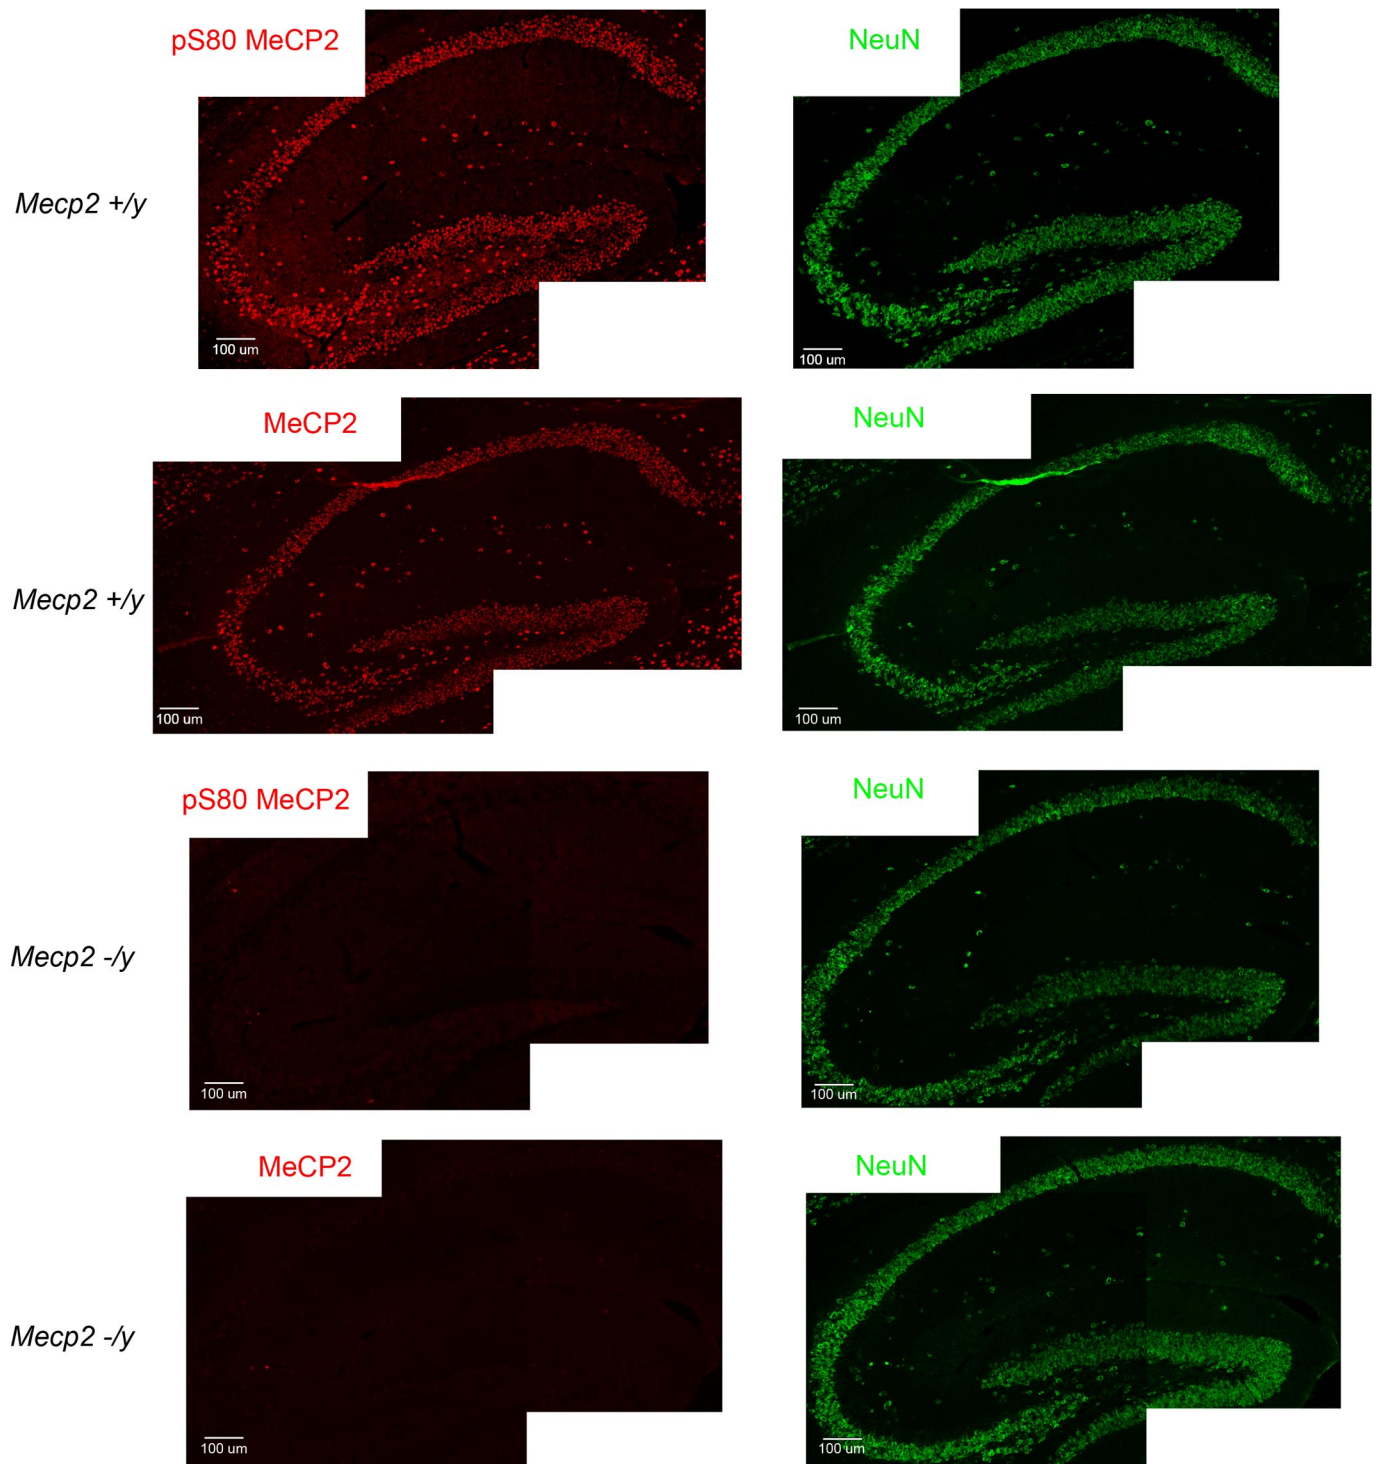

**Fig. S5.** Immunostainings of postnatal 3 weeks old mouse hippocampal region with neuronal marker NeuN, phospho-S80 MeCP2 and Upstate C-terminal MeCP2 antibody respectively. Comparable *Mecp2* -/*y* sections served as negative controls.

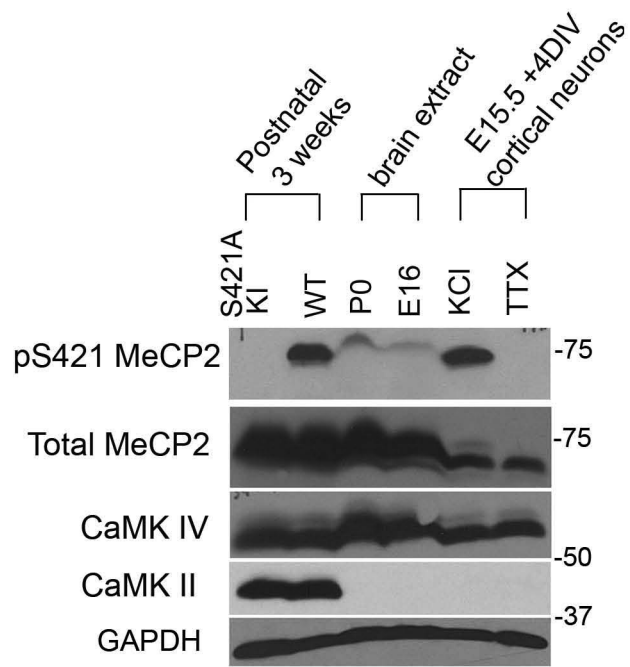

**Fig. S6.** Protein levels of MeCP2 phospho-S421, CaMK II and CaMK IV at different developmental stages. Western blot was done with lysates of E15.5 + 4DIV cultured mouse cortical neurons with TTX or KCl treatment, E16 and P0 brain extracts, postnatal 3-weeks-old wild type and S421A mutant mice brain extracts, respectively.



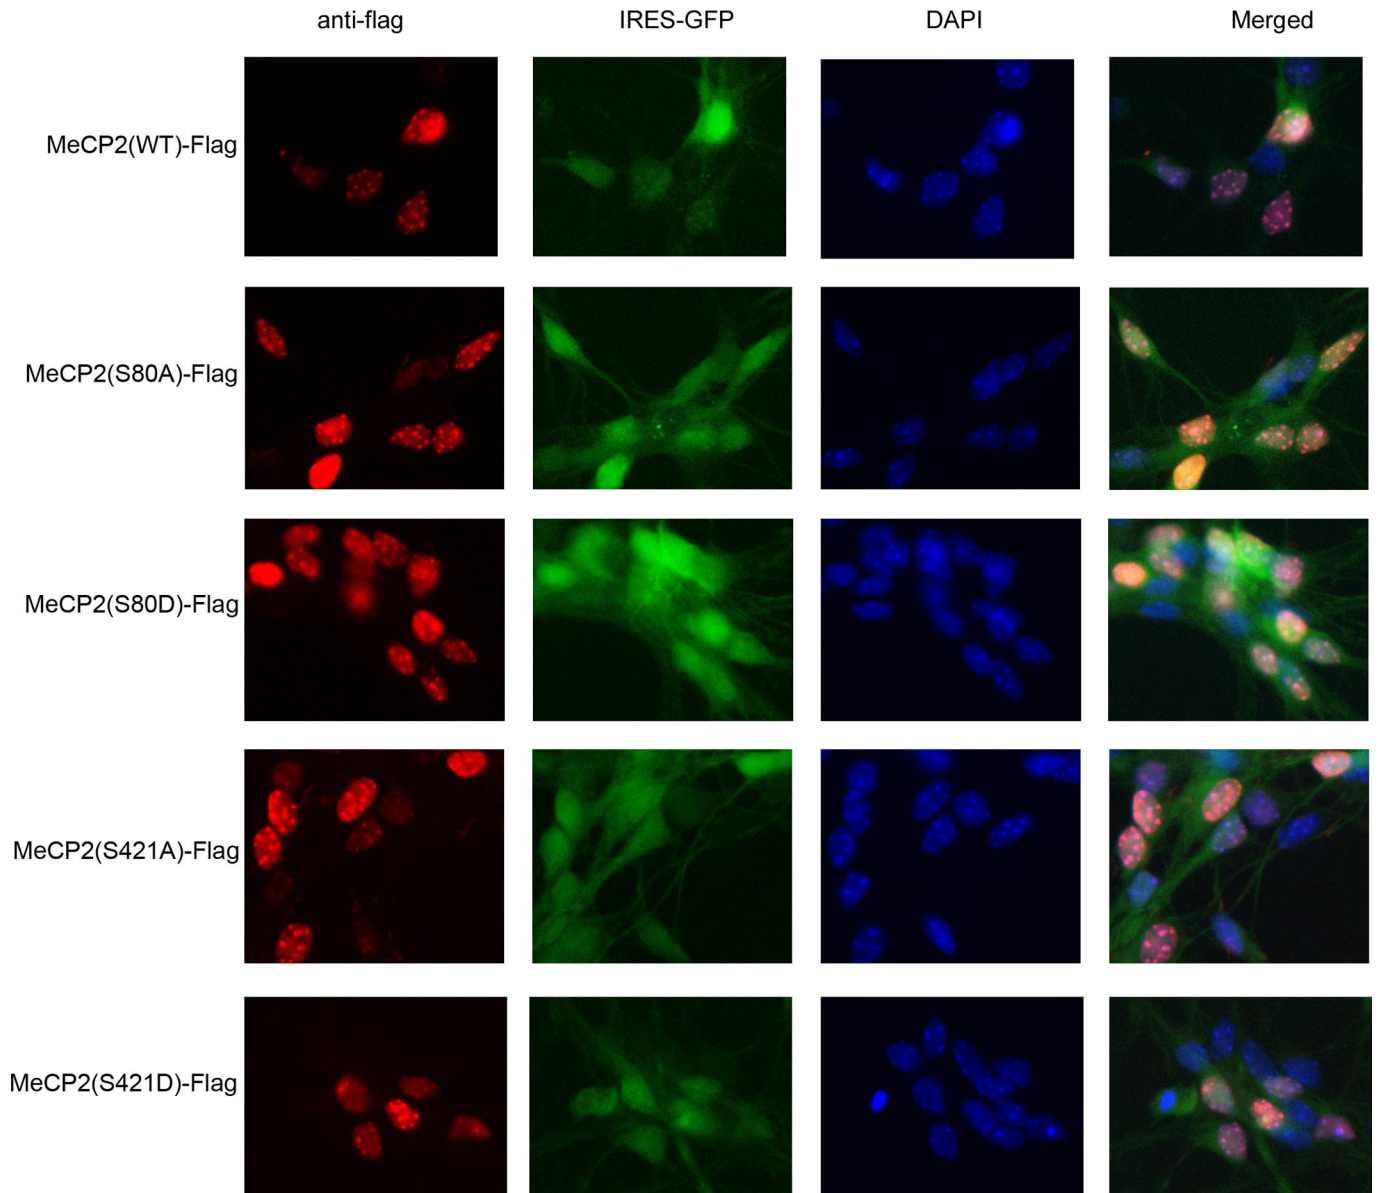

**Fig. S7.** Immunostainings of flag-tagged wild-type or S80/S421 phosphorylation site mutant MeCP2 in resting neurons did not show global distribution changes. Lentivirus infected neurons also express GFP.

A

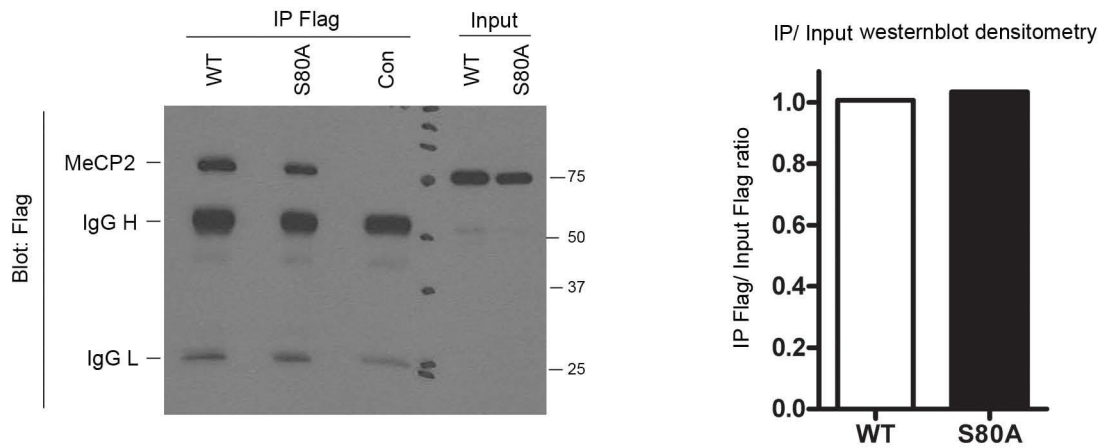

B

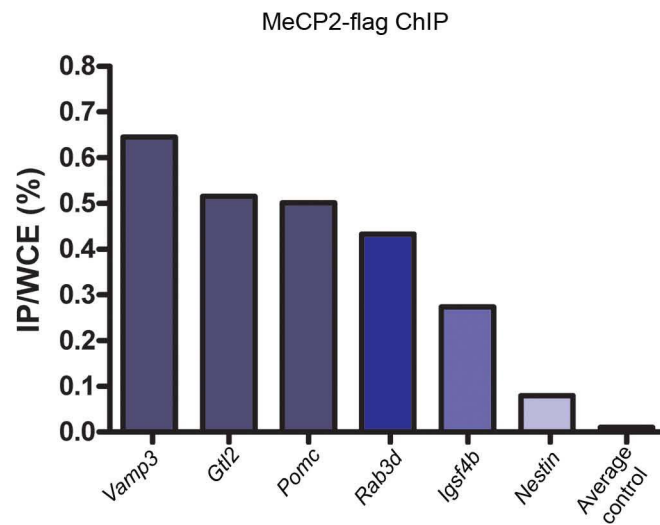

**Fig. S8.** Chromatin immunoprecipitation with the flag antibody is specific. (A) Western blot following immunoprecipitation under ChIP condition with mouse cortical neurons showed that both wild-type and S80A MeCP2 could be immunoprecipitated with similar efficiency. (B) MeCP2 showed different binding affinities at different promoters. Dark blue shaded promoters (*Vamp3*, *Gtl2* and *Pomc*) are relatively high affinity binding targets. Medium to light blue shaded promoters (*Rab3d* and *Igsf4b*) are relatively medium to low affinity binding targets. Very light blue shaded *Nestin* promoter served as a negative control with very low binding affinity. Flag immunoprecipitation from no flag-tagged MeCP2 neurons served as the average control.

A

### Log-ratio chart for S80A vs. WT

149 genes overexpressed; 56 genes underexpressed  
Click on genes to get info

All 43,379 transcripts present on the array

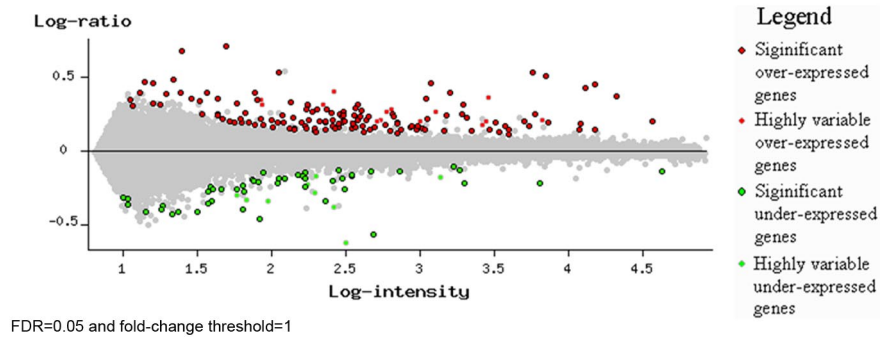

B

### Log-ratio chart for S80A vs. WT

201 genes overexpressed; 82 genes underexpressed  
Click on genes to get info

All 43,379 transcripts present on the array

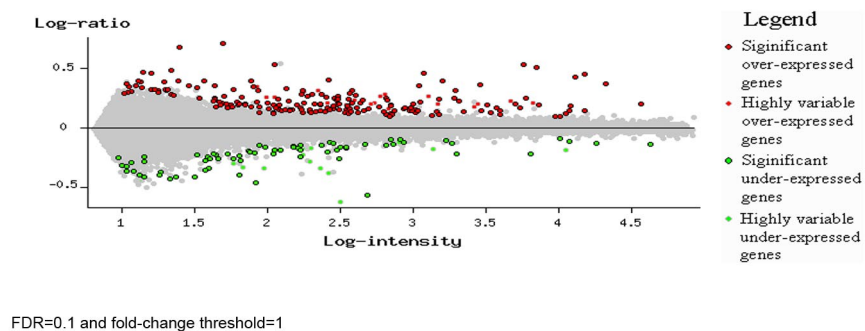

C

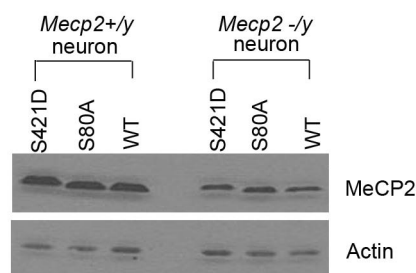

**Fig. S9.** Transcriptional profiling of *Mecp2* null mouse cortical neurons rescued with wild-type and phosphorylation site mutant MeCP2. Log-ratio charts showed the distribution of up-regulated and down-regulated genes of neurons expressing MeCP2 S80A versus those expressing wild-type MeCP2 with FDR at 0.05 (A) and FDR at 0.1 (B) respectively. (C) *Mecp2* null cortical neurons rescued with wild-type and mutant MeCP2 showed similar levels of exogenous MeCP2 expression, which are approximately the same level compared with the wild-type neurons.







**Table S2. Genes that are up-regulated in S80A samples compared with wild-type samples which may contain multiple probes targeting the same gene**

| Symbol                                                                                   | Annotation       | Mean (S80A)   | Mean (WT)     | Log Ratio     | Fold Change  | FDR      |
|------------------------------------------------------------------------------------------|------------------|---------------|---------------|---------------|--------------|----------|
| Genes that are up-regulated in S80A samples compared with wild-type samples (FDR < 0.05) |                  |               |               |               |              |          |
| Arl15                                                                                    | NM_172595        | 4.0235        | 3.4914        | 0.5321        | 3.404        | 0        |
| Vapb                                                                                     | NM_019806        | 4.0942        | 3.59151       | 0.50269       | 3.181        | 0        |
| Ube2s                                                                                    | AK003078         | 4.3967        | 3.94831       | 0.44839       | 2.807        | 0        |
| Ube2s                                                                                    | NM_133777        | 4.3203        | 3.89831       | 0.42199       | 2.642        | 0        |
| Ddit4                                                                                    | NM_029083        | 4.5083        | 4.1408        | 0.3675        | 2.33         | 0        |
| Igsf4b                                                                                   | NM_053199        | 3.3031        | 2.8497        | 0.4534        | 2.84         | 0        |
| Chmp4b                                                                                   | NM_029362        | 3.3969        | 3.00531       | 0.39159       | 2.463        | 0        |
| Cbx8                                                                                     | AK051905         | 3.6363        | 3.27861       | 0.35769       | 2.278        | 0        |
| Cd93                                                                                     | NM_010740        | 2.0501        | 1.3441        | 0.706         | 5.081        | 0        |
| Rgag4                                                                                    | NM_183318        | 3.2206        | 2.8646        | 0.356         | 2.269        | 0        |
| Arl15                                                                                    | NM_172595        | 2.3156        | 1.79011       | 0.52549       | 3.353        | 0        |
| 2400003N08Rik                                                                            | NM_178622        | 3.4424        | 3.1342        | 0.3082        | 2.033        | 0        |
| BC017612                                                                                 | NM_133214        | 2.6209        | 2.2234        | 0.3975        | 2.497        | 0        |
| Rab5c                                                                                    | NM_024456        | 3.8966        | 3.64781       | 0.24879       | 1.773        | 0        |
| <b>Car3</b>                                                                              | <b>NM_007606</b> | <b>1.7327</b> | <b>1.0611</b> | <b>0.6716</b> | <b>4.694</b> | <b>0</b> |
| Tcf25                                                                                    | NM_025804        | 4.661         | 4.46511       | 0.19589       | 1.569        | 0.0046   |
| Rpo1-2                                                                                   | NM_009086        | 2.7401        | 2.4276        | 0.3125        | 2.053        | 0        |
| Odf2                                                                                     | BC057001         | 3.2338        | 2.9739        | 0.2599        | 1.819        | 0.0006   |
| Sympk                                                                                    | BC049852         | 3.4027        | 3.15771       | 0.24499       | 1.757        | 0        |
| Odf2                                                                                     | BC057001         | 2.9472        | 2.6675        | 0.2797        | 1.904        | 0.003    |
| Tcf25                                                                                    | NM_025804        | 3.9199        | 3.71601       | 0.20389       | 1.599        | 0.0164   |
| Mpst                                                                                     | NM_138670        | 3.2991        | 3.0624        | 0.2367        | 1.724        | 0        |
| Setd5                                                                                    | NM_028385        | 4.1714        | 3.9884        | 0.183         | 1.524        | 0        |
| Gm1752                                                                                   | XM_001003685     | 2.0884        | 1.6978        | 0.3906        | 2.458        | 0        |
| Tsply1                                                                                   | NM_009433        | 3.9586        | 3.7672        | 0.1914        | 1.553        | 0.0002   |
| Nans                                                                                     | NM_053179        | 3.4225        | 3.20001       | 0.22249       | 1.669        | 0        |
| Med18                                                                                    | NM_026039        | 2.9089        | 2.6437        | 0.2652        | 1.841        | 0.0001   |
| 2810482G21Rik                                                                            | AK122545         | 2.7054        | 2.419         | 0.2864        | 1.933        | 0        |
| Arl6ip5                                                                                  | NM_022992        | 3.7976        | 3.5997        | 0.1979        | 1.577        | 0.0004   |
| Vamp3                                                                                    | NM_009498        | 2.5043        | 2.1942        | 0.3101        | 2.042        | 0.0005   |
| Rab3d                                                                                    | NM_031874        | 2.7433        | 2.46791       | 0.27539       | 1.885        | 0        |
| Rian                                                                                     | AK017440         | 3.5411        | 3.3383        | 0.2028        | 1.595        | 0.0145   |
| AK143126                                                                                 | AK143126         | 2.2967        | 1.9704        | 0.3263        | 2.119        | 0        |
| Tatdn2                                                                                   | NM_001033463     | 2.9354        | 2.6879        | 0.2475        | 1.768        | 0        |
| AK046873                                                                                 | AK046873         | 2.3955        | 2.0872        | 0.3083        | 2.033        | 0        |
| NAP057026-1                                                                              | NAP057026-1      | 2.404         | 2.09791       | 0.30609       | 2.023        | 0        |
| Rnf20                                                                                    | NM_182999        | 3.1599        | 2.94071       | 0.21919       | 1.656        | 0.0014   |
| Zswim6                                                                                   | BC021311         | 2.9449        | 2.70991       | 0.23499       | 1.717        | 0        |
| Fgr                                                                                      | NM_010208        | 2.0997        | 1.75521       | 0.34449       | 2.21         | 0.0007   |
| Igsf4c                                                                                   | NM_153112        | 3.6004        | 3.4112        | 0.1892        | 1.545        | 0        |
| 5830457O10Rik                                                                            | NM_145412        | 2.5089        | 2.2319        | 0.277         | 1.892        | 0        |
| Supt7l                                                                                   | NM_028150        | 2.0734        | 1.73091       | 0.34249       | 2.2          | 0        |
| B4galt7                                                                                  | NM_146045        | 2.6143        | 2.3541        | 0.2602        | 1.82         | 0        |
| <b>Polh</b>                                                                              | <b>NM_030715</b> | <b>1.5822</b> | <b>1.1015</b> | <b>0.4807</b> | <b>3.024</b> | <b>0</b> |
| Vapb                                                                                     | NM_019806        | 2.4449        | 2.1668        | 0.2781        | 1.897        | 0        |
| Cntn2                                                                                    | NM_177129        | 3.8167        | 3.6481        | 0.1686        | 1.474        | 0.0002   |
| 2610200G18Rik                                                                            | NM_025998        | 2.3788        | 2.10021       | 0.27859       | 1.899        | 0        |
| LOC665155                                                                                | XM_976391        | 1.7638        | 1.3713        | 0.3925        | 2.468        | 0        |
| Kif15                                                                                    | NM_010620        | 2.7726        | 2.5416        | 0.231         | 1.702        | 0.0004   |
| Lix1                                                                                     | BC063057         | 2.5354        | 2.2814        | 0.254         | 1.794        | 0.0003   |
| Cplx2                                                                                    | NM_009946        | 3.1035        | 2.9004        | 0.2031        | 1.596        | 0.0052   |
| Snap29                                                                                   | NM_023348        | 3.6546        | 3.48381       | 0.17079       | 1.481        | 0.0011   |
| AK050977                                                                                 | AK050977         | 2.6763        | 2.43881       | 0.23749       | 1.727        | 0        |
| Fgd4                                                                                     | AK042588         | 2.0955        | 1.78331       | 0.31219       | 2.052        | 0.0001   |
| Bloc1s3                                                                                  | NM_177692        | 2.5802        | 2.3345        | 0.2457        | 1.76         | 0        |
| Med18                                                                                    | NM_026039        | 2.713         | 2.48221       | 0.23079       | 1.701        | 0.0001   |
| Ly6h                                                                                     | NM_011837        | 3.5055        | 3.3301        | 0.1754        | 1.497        | 0.0184   |
| Aco1                                                                                     | NM_007386        | 2.4103        | 2.14741       | 0.26289       | 1.831        | 0.0001   |
| Lsm14b                                                                                   | NM_177727        | 2.6059        | 2.36521       | 0.24069       | 1.74         | 0.0035   |
| Pafah1b1                                                                                 | NM_013625        | 4.2438        | 4.1015        | 0.1423        | 1.387        | 0.0031   |
| Ufd1l                                                                                    | NM_011672        | 2.583         | 2.3464        | 0.2366        | 1.724        | 0.0305   |



| Symbol             | Annotation         | Mean (S80A)   | Mean (WT)      | Log Ratio      | Fold Change  | FDR           |
|--------------------|--------------------|---------------|----------------|----------------|--------------|---------------|
| Stk32c             | NM_021302          | 1.8192        | 1.46541        | 0.35379        | 2.258        | 0             |
| Pigt               | NM_133779          | 4.1392        | 3.99691        | 0.14229        | 1.387        | 0.0209        |
| Raf1               | AK036317           | 2.5964        | 2.36601        | 0.23039        | 1.699        | 0             |
| TC1522927          | TC1522927          | 1.9304        | 1.60751        | 0.32289        | 2.103        | 0             |
| Psmc9              | NM_026000          | 2.8406        | 2.63381        | 0.20679        | 1.609        | 0.0256        |
| <b>TC1477251</b>   | <b>TC1477251</b>   | <b>1.434</b>  | <b>0.97431</b> | <b>0.45969</b> | <b>2.881</b> | <b>0.0003</b> |
| E430012M05Rik      | AK051077           | 1.5833        | 1.19081        | 0.39249        | 2.468        | 0.0124        |
| G430041M01Rik      | NM_198102          | 2.9468        | 2.7561         | 0.1907         | 1.551        | 0             |
| Rad1               | NM_011232          | 2.7436        | 2.5401         | 0.2035         | 1.597        | 0.0003        |
| AK043110           | AK043110           | 2.6822        | 2.4751         | 0.2071         | 1.611        | 0.0221        |
| <b>AK084126</b>    | <b>AK084126</b>    | <b>1.3788</b> | <b>0.9132</b>  | <b>0.4656</b>  | <b>2.921</b> | <b>0.0018</b> |
| ENSMUST00000088292 | ENSMUST00000088292 | 2.8102        | 2.6148         | 0.1954         | 1.568        | 0.0101        |
| Rgs16              | NM_011267          | 2.9383        | 2.75491        | 0.18339        | 1.525        | 0             |
| <b>Cdk6</b>        | <b>NM_009873</b>   | <b>1.64</b>   | <b>1.28761</b> | <b>0.35239</b> | <b>2.251</b> | <b>0.0089</b> |
| ENSMUST00000066134 | ENSMUST00000066134 | 3.6712        | 3.52821        | 0.14299        | 1.389        | 0.003         |
| Peo1               | NM_153796          | 1.6882        | 1.35021        | 0.33799        | 2.177        | 0             |
| Rab11b             | NM_008997          | 2.5199        | 2.30881        | 0.21109        | 1.625        | 0.0387        |
| U2af2              | NM_133671          | 2.1962        | 1.9526         | 0.2436         | 1.752        | 0.0017        |
| Hnrpa0             | AK019388           | 3.069         | 2.90181        | 0.16719        | 1.469        | 0.001         |
| Paxip1             | NM_018878          | 1.4839        | 1.09991        | 0.38399        | 2.42         | 0.0199        |
| Sh3bp2             | NM_011893          | 2.5914        | 2.39321        | 0.19819        | 1.578        | 0.0236        |
| Map3k10            | XM_887283          | 3.5426        | 3.4005         | 0.1421         | 1.387        | 0.0073        |
| Gas2l3             | AK018456           | 2.6355        | 2.44181        | 0.19369        | 1.562        | 0.0374        |
| 2410081M15Rik      | NM_028603          | 3.025         | 2.85821        | 0.16679        | 1.468        | 0.0006        |
| Gabbr1             | BC054735           | 2.8551        | 2.6808         | 0.1743         | 1.493        | 0.0272        |
| Slc8a2             | NM_148946          | 2.2588        | 2.03411        | 0.22469        | 1.677        | 0.0006        |
| Ing3               | NM_023626          | 2.5752        | 2.3815         | 0.1937         | 1.562        | 0.0009        |
| 6430526N21Rik      | NM_001033383       | 2.4639        | 2.2607         | 0.2032         | 1.596        | 0.0015        |
| Srebf2             | NM_033218          | 3.0197        | 2.85781        | 0.16189        | 1.451        | 0.0002        |
| Ube2b              | AK135056           | 2.3598        | 2.15171        | 0.20809        | 1.614        | 0             |
| Ccdc49             | NM_026186          | 2.6446        | 2.4617         | 0.1829         | 1.523        | 0.0058        |
| Bcl9               | AK147659           | 2.4209        | 2.2216         | 0.1993         | 1.582        | 0.0004        |
| AK169992           | AK169992           | 1.9518        | 1.69871        | 0.25309        | 1.79         | 0.0005        |
| Rbm9               | NM_175387          | 3.4147        | 3.27721        | 0.13749        | 1.372        | 0.0005        |
| Metrn              | NM_133719          | 3.0922        | 2.9404         | 0.1518         | 1.418        | 0.0077        |
| Chst7              | NM_021715          | 2.5493        | 2.3629         | 0.1864         | 1.536        | 0.0053        |
| Polr3gl            | NM_027241          | 3.597         | 3.46741        | 0.12959        | 1.347        | 0.0483        |
| BB113933           | BB113933           | 3.0154        | 2.8596         | 0.1558         | 1.431        | 0.0004        |
| Hnrpa0             | AK019388           | 2.4619        | 2.26901        | 0.19289        | 1.559        | 0.0085        |
| Olig1              | NM_016968          | 3.0919        | 2.9429         | 0.149          | 1.409        | 0.0103        |
| <b>Cyp26a1</b>     | <b>NM_007811</b>   | <b>1.3164</b> | <b>0.9226</b>  | <b>0.3938</b>  | <b>2.476</b> | <b>0.0314</b> |
| Osbpl8             | NM_175489          | 2.6326        | 2.46051        | 0.17209        | 1.486        | 0.0237        |
| AK030273           | AK030273           | 2.6977        | 2.5313         | 0.1664         | 1.466        | 0.0011        |
| BC024868           | NM_199149          | 3.0649        | 2.9198         | 0.1451         | 1.396        | 0.04          |
| Cxadr              | NM_001025192       | 3.2273        | 3.0925         | 0.1348         | 1.363        | 0.0016        |
| Fbln2              | NM_007992          | 2.7746        | 2.61891        | 0.15569        | 1.431        | 0.0062        |
| Acads              | NM_007383          | 2.1065        | 1.897          | 0.2095         | 1.619        | 0.0029        |
| ENSMUST00000098637 | ENSMUST00000098637 | 2.3           | 2.11051        | 0.18949        | 1.546        | 0.005         |
| Fbxo30             | NM_027968          | 3.0447        | 2.905          | 0.1397         | 1.379        | 0.008         |
| Slc27a1            | NM_011977          | 2.946         | 2.8021         | 0.1439         | 1.392        | 0.0015        |
| Tigd3              | NM_198634          | 1.7684        | 1.51781        | 0.25059        | 1.78         | 0.01          |
| 0610011I04Rik      | NM_025326          | 2.0326        | 1.8194         | 0.2132         | 1.633        | 0.006         |
| Igf2bp1            | NM_009951          | 2.6447        | 2.48871        | 0.15599        | 1.432        | 0.001         |
| Zfp146             | NM_011980          | 2.1809        | 1.98901        | 0.19189        | 1.555        | 0.0016        |
| C79127             | NM_177691          | 1.7607        | 1.51971        | 0.24099        | 1.741        | 0.0157        |
| 2810474O19Rik      | NM_026054          | 3.6486        | 3.53901        | 0.10959        | 1.287        | 0.0083        |
| <b>AK129128</b>    | <b>AK079259</b>    | <b>1.3877</b> | <b>1.0695</b>  | <b>0.3182</b>  | <b>2.08</b>  | <b>0.0452</b> |
| Unc5b              | NM_029770          | 2.1387        | 1.9494         | 0.1893         | 1.546        | 0.0006        |
| <b>Cdca7l</b>      | <b>NM_146040</b>   | <b>1.6623</b> | <b>1.4124</b>  | <b>0.2499</b>  | <b>1.777</b> | <b>0.0192</b> |
| A_52_P893105       | A_52_P893105       | 1.9018        | 1.68781        | 0.21399        | 1.636        | 0.0011        |
| TC1521263          | TC1521263          | 2.532         | 2.37571        | 0.15629        | 1.433        | 0.001         |
| 1500009C09Rik      | XM_901682          | 2.6204        | 2.4701         | 0.1503         | 1.413        | 0.0086        |
| <b>Trip10</b>      | <b>NM_134125</b>   | <b>1.3637</b> | <b>1.04631</b> | <b>0.31739</b> | <b>2.076</b> | <b>0.022</b>  |
| Zic1               | NM_009573          | 3.0761        | 2.94931        | 0.12679        | 1.339        | 0.0374        |

| Symbol                                                                                  | Annotation       | Mean (S80A)   | Mean (WT)     | Log Ratio     | Fold Change  | FDR           |
|-----------------------------------------------------------------------------------------|------------------|---------------|---------------|---------------|--------------|---------------|
| BU562039                                                                                | BU562039         | 2.7349        | 2.59161       | 0.14329       | 1.39         | 0.0243        |
| Cyp20a1                                                                                 | NM_030013        | 2.3133        | 2.1424        | 0.1709        | 1.482        | 0.0086        |
| <b>Gipr</b>                                                                             | <b>AK146552</b>  | <b>1.3041</b> | <b>0.9693</b> | <b>0.3348</b> | <b>2.161</b> | <b>0.0413</b> |
| Igf1r                                                                                   | NM_010513        | 2.5654        | 2.41351       | 0.15189       | 1.418        | 0.0198        |
| Wasl                                                                                    | NM_028459        | 2.504         | 2.35151       | 0.15249       | 1.42         | 0.0006        |
| Soat1                                                                                   | NM_009230        | 1.9139        | 1.71101       | 0.20289       | 1.595        | 0.0405        |
| Al461788                                                                                | AK028016         | 1.2278        | 0.8805        | 0.3473        | 2.224        | 0.0418        |
| Mical2                                                                                  | NM_177282        | 1.743         | 1.5209        | 0.2221        | 1.667        | 0.0483        |
| Ceecam1                                                                                 | NM_207298        | 1.9488        | 1.7543        | 0.1945        | 1.564        | 0.018         |
| Tbc1d9                                                                                  | NM_027758        | 1.777         | 1.56151       | 0.21549       | 1.642        | 0.0147        |
| Kpna4                                                                                   | NM_008467        | 1.82          | 1.6176        | 0.2024        | 1.593        | 0.0272        |
| Snf1lk                                                                                  | NM_010831        | 2.6865        | 2.5556        | 0.1309        | 1.351        | 0.0362        |
| 0710001B24Rik                                                                           | NM_175118        | 2.6386        | 2.50531       | 0.13329       | 1.359        | 0.0322        |
| BC021831                                                                                | BC021831         | 1.8534        | 1.65831       | 0.19509       | 1.567        | 0.0304        |
| Cnr1                                                                                    | NM_007726        | 2.3633        | 2.2138        | 0.1495        | 1.41         | 0.0039        |
| AK044799                                                                                | AK044799         | 1.892         | 1.70171       | 0.19029       | 1.549        | 0.0077        |
| TC1440691                                                                               | TC1440691        | 2.4368        | 2.29251       | 0.14429       | 1.394        | 0.0051        |
| Calcoco1                                                                                | NM_026192        | 1.9762        | 1.79781       | 0.17839       | 1.507        | 0.024         |
| Rdh13                                                                                   | AK089458         | 2.0336        | 1.86151       | 0.17209       | 1.486        | 0.0063        |
| Zbtb24                                                                                  | AF263010         | 2.3131        | 2.1651        | 0.148         | 1.406        | 0.0088        |
| Arvcf                                                                                   | NM_033474        | 2.904         | 2.78831       | 0.11569       | 1.305        | 0.0036        |
| AK037868                                                                                | AK037868         | 1.7816        | 1.5865        | 0.1951        | 1.567        | 0.0431        |
| Mapk8                                                                                   | NM_016700        | 2.2339        | 2.0824        | 0.1515        | 1.417        | 0.0488        |
| Peg3                                                                                    | NM_008817        | 2.1974        | 2.046         | 0.1514        | 1.417        | 0.0292        |
| Snx27                                                                                   | AK147452         | 1.8533        | 1.67501       | 0.17829       | 1.507        | 0.0359        |
| <b>D030051J21Rik</b>                                                                    | <b>AK083595</b>  | <b>1.1949</b> | <b>0.8988</b> | <b>0.2961</b> | <b>1.977</b> | <b>0.0346</b> |
| Chd1                                                                                    | NM_007690        | 2.1572        | 2.01          | 0.1472        | 1.403        | 0.0477        |
| Gsk3b                                                                                   | NM_019827        | 2.3586        | 2.22501       | 0.13359       | 1.36         | 0.0127        |
| Lrrc57                                                                                  | NM_025657        | 2.3637        | 2.2332        | 0.1305        | 1.35         | 0.0094        |
| Stch                                                                                    | NM_030201        | 2.8925        | 2.7943        | 0.0982        | 1.253        | 0.024         |
| 6430704M03Rik                                                                           | AK078331         | 2.1056        | 1.97551       | 0.13009       | 1.349        | 0.0483        |
| Genes that are up-regulated in S80A samples compared with wild-type samples (FDR < 0.1) |                  |               |               |               |              |               |
| Arl15                                                                                   | NM_172595        | 4.0235        | 3.4914        | 0.5321        | 3.404        | 0             |
| Vapb                                                                                    | NM_019806        | 4.0942        | 3.59151       | 0.50269       | 3.181        | 0             |
| Ube2s                                                                                   | AK003078         | 4.3967        | 3.94831       | 0.44839       | 2.807        | 0             |
| Ube2s                                                                                   | NM_133777        | 4.3203        | 3.89831       | 0.42199       | 2.642        | 0             |
| Ddit4                                                                                   | NM_029083        | 4.5083        | 4.1408        | 0.3675        | 2.33         | 0             |
| Igsf4b                                                                                  | NM_053199        | 3.3031        | 2.8497        | 0.4534        | 2.84         | 0             |
| Chmp4b                                                                                  | NM_029362        | 3.3969        | 3.00531       | 0.39159       | 2.463        | 0             |
| Cbx8                                                                                    | AK051905         | 3.6363        | 3.27861       | 0.35769       | 2.278        | 0             |
| Cd93                                                                                    | NM_010740        | 2.0501        | 1.3441        | 0.706         | 5.081        | 0             |
| Rgag4                                                                                   | NM_183318        | 3.2206        | 2.8646        | 0.356         | 2.269        | 0             |
| Arl15                                                                                   | NM_172595        | 2.3156        | 1.79011       | 0.52549       | 3.353        | 0             |
| 2400003N08Rik                                                                           | NM_178622        | 3.4424        | 3.1342        | 0.3082        | 2.033        | 0             |
| BC017612                                                                                | NM_133214        | 2.6209        | 2.2234        | 0.3975        | 2.497        | 0             |
| Rab5c                                                                                   | NM_024456        | 3.8966        | 3.64781       | 0.24879       | 1.773        | 0             |
| <b>Car3</b>                                                                             | <b>NM_007606</b> | <b>1.7327</b> | <b>1.0611</b> | <b>0.6716</b> | <b>4.694</b> | <b>0</b>      |
| Tcf25                                                                                   | NM_025804        | 4.661         | 4.46511       | 0.19589       | 1.569        | 0.0046        |
| Lmnb1                                                                                   | NM_010721        | 3.7832        | 3.55731       | 0.22589       | 1.682        | 0.0663        |
| Rpo1-2                                                                                  | NM_009086        | 2.7401        | 2.4276        | 0.3125        | 2.053        | 0             |
| Odf2                                                                                    | BC057001         | 3.2338        | 2.9739        | 0.2599        | 1.819        | 0.0006        |
| Sympk                                                                                   | BC049852         | 3.4027        | 3.15771       | 0.24499       | 1.757        | 0             |
| Odf2                                                                                    | BC057001         | 2.9472        | 2.6675        | 0.2797        | 1.904        | 0.003         |
| Tcf25                                                                                   | NM_025804        | 3.9199        | 3.71601       | 0.20389       | 1.599        | 0.0164        |
| Mpst                                                                                    | NM_138670        | 3.2991        | 3.0624        | 0.2367        | 1.724        | 0             |
| Setd5                                                                                   | NM_028385        | 4.1714        | 3.9884        | 0.183         | 1.524        | 0             |
| Gm1752                                                                                  | XM_001003685     | 2.0884        | 1.6978        | 0.3906        | 2.458        | 0             |
| Tspyl1                                                                                  | NM_009433        | 3.9586        | 3.7672        | 0.1914        | 1.553        | 0.0002        |
| Nans                                                                                    | NM_053179        | 3.4225        | 3.20001       | 0.22249       | 1.669        | 0             |
| Med18                                                                                   | NM_026039        | 2.9089        | 2.6437        | 0.2652        | 1.841        | 0.0001        |
| 2810482G21Rik                                                                           | AK122545         | 2.7054        | 2.419         | 0.2864        | 1.933        | 0             |
| Arl6ip5                                                                                 | NM_022992        | 3.7976        | 3.5997        | 0.1979        | 1.577        | 0.0004        |
| Vamp3                                                                                   | NM_009498        | 2.5043        | 2.1942        | 0.3101        | 2.042        | 0.0005        |
| Rab3d                                                                                   | NM_031874        | 2.7433        | 2.46791       | 0.27539       | 1.885        | 0             |

| Symbol               | Annotation         | Mean (S80A)   | Mean (WT)      | Log Ratio      | Fold Change  | FDR           |
|----------------------|--------------------|---------------|----------------|----------------|--------------|---------------|
| Rian                 | AK017440           | 3.5411        | 3.3383         | 0.2028         | 1.595        | 0.0145        |
| AK143126             | AK143126           | 2.2967        | 1.9704         | 0.3263         | 2.119        | 0             |
| Tatdn2               | NM.001033463       | 2.9354        | 2.6879         | 0.2475         | 1.768        | 0             |
| AK046873             | AK046873           | 2.3955        | 2.0872         | 0.3083         | 2.033        | 0             |
| NAP057026-1          | NAP057026-1        | 2.404         | 2.09791        | 0.30609        | 2.023        | 0             |
| Rnf20                | NM.182999          | 3.1599        | 2.94071        | 0.21919        | 1.656        | 0.0014        |
| Zswim6               | BC021311           | 2.9449        | 2.70991        | 0.23499        | 1.717        | 0             |
| Fgr                  | NM.010208          | 2.0997        | 1.75521        | 0.34449        | 2.21         | 0.0007        |
| Igsf4c               | NM.153112          | 3.6004        | 3.4112         | 0.1892         | 1.545        | 0             |
| 5830457O10Rik        | NM.145412          | 2.5089        | 2.2319         | 0.277          | 1.892        | 0             |
| Supt7l               | NM.028150          | 2.0734        | 1.73091        | 0.34249        | 2.2          | 0             |
| B4galt7              | NM.146045          | 2.6143        | 2.3541         | 0.2602         | 1.82         | 0             |
| Polh                 | NM.030715          | 1.5822        | 1.1015         | 0.4807         | 3.024        | 0             |
| Vapb                 | NM.019806          | 2.4449        | 2.1668         | 0.2781         | 1.897        | 0             |
| Mapk8ip1             | NM.011162          | 3.2656        | 3.0659         | 0.1997         | 1.583        | 0.0603        |
| Cntn2                | NM.177129          | 3.8167        | 3.6481         | 0.1686         | 1.474        | 0.0002        |
| 2610200G18Rik        | NM.025998          | 2.3788        | 2.10021        | 0.27859        | 1.899        | 0             |
| LOC665155            | XM.976391          | 1.7638        | 1.3713         | 0.3925         | 2.468        | 0             |
| Kif15                | NM.010620          | 2.7726        | 2.5416         | 0.231          | 1.702        | 0.0004        |
| Lix1                 | BC063057           | 2.5354        | 2.2814         | 0.254          | 1.794        | 0.0003        |
| Cplx2                | NM.009946          | 3.1035        | 2.9004         | 0.2031         | 1.596        | 0.0052        |
| Snap29               | NM.023348          | 3.6546        | 3.48381        | 0.17079        | 1.481        | 0.0011        |
| AK050977             | AK050977           | 2.6763        | 2.43881        | 0.23749        | 1.727        | 0             |
| Fgd4                 | AK042588           | 2.0955        | 1.78331        | 0.31219        | 2.052        | 0.0001        |
| Bloc1s3              | NM.177692          | 2.5802        | 2.3345         | 0.2457         | 1.76         | 0             |
| Med18                | NM.026039          | 2.713         | 2.48221        | 0.23079        | 1.701        | 0.0001        |
| Ly6h                 | NM.011837          | 3.5055        | 3.3301         | 0.1754         | 1.497        | 0.0184        |
| Aco1                 | NM.007386          | 2.4103        | 2.14741        | 0.26289        | 1.831        | 0.0001        |
| Lsm14b               | NM.177727          | 2.6059        | 2.36521        | 0.24069        | 1.74         | 0.0035        |
| Pafah1b1             | NM.013625          | 4.2438        | 4.1015         | 0.1423         | 1.387        | 0.0031        |
| Ufd1l                | NM.011672          | 2.583         | 2.3464         | 0.2366         | 1.724        | 0.0305        |
| Stk32c               | NM.021302          | 1.8192        | 1.46541        | 0.35379        | 2.258        | 0             |
| Pigt                 | NM.133779          | 4.1392        | 3.99691        | 0.14229        | 1.387        | 0.0209        |
| Raf1                 | AK036317           | 2.5964        | 2.36601        | 0.23039        | 1.699        | 0             |
| TC1522927            | TC1522927          | 1.9304        | 1.60751        | 0.32289        | 2.103        | 0             |
| Psmc9                | NM.026000          | 2.8406        | 2.63381        | 0.20679        | 1.609        | 0.0256        |
| <b>TC1477251</b>     | <b>TC1477251</b>   | <b>1.434</b>  | <b>0.97431</b> | <b>0.45969</b> | <b>2.881</b> | <b>0.0003</b> |
| <b>E430012M05Rik</b> | <b>AK051077</b>    | <b>1.5833</b> | <b>1.19081</b> | <b>0.39249</b> | <b>2.468</b> | <b>0.0124</b> |
| G430041M01Rik        | NM.198102          | 2.9468        | 2.7561         | 0.1907         | 1.551        | 0             |
| Rad1                 | NM.011232          | 2.7436        | 2.5401         | 0.2035         | 1.597        | 0.0003        |
| AK043110             | AK043110           | 2.6822        | 2.4751         | 0.2071         | 1.611        | 0.0221        |
| <b>AK084126</b>      | <b>AK084126</b>    | <b>1.3788</b> | <b>0.9132</b>  | <b>0.4656</b>  | <b>2.921</b> | <b>0.0018</b> |
| ENSMUST00000088292   | ENSMUST00000088292 | 2.8102        | 2.6148         | 0.1954         | 1.568        | 0.0101        |
| Rgs16                | NM.011267          | 2.9383        | 2.75491        | 0.18339        | 1.525        | 0             |
| Jub                  | NM.010590          | 2.1749        | 1.92241        | 0.25249        | 1.788        | 0.0836        |
| <b>Cdk6</b>          | <b>NM.009873</b>   | <b>1.64</b>   | <b>1.28761</b> | <b>0.35239</b> | <b>2.251</b> | <b>0.0089</b> |
| ENSMUST00000066134   | ENSMUST00000066134 | 3.6712        | 3.52821        | 0.14299        | 1.389        | 0.003         |
| <b>Peo1</b>          | <b>NM.153796</b>   | <b>1.6882</b> | <b>1.35021</b> | <b>0.33799</b> | <b>2.177</b> | <b>0</b>      |
| Rab11b               | NM.008997          | 2.5199        | 2.30881        | 0.21109        | 1.625        | 0.0387        |
| U2af2                | NM.133671          | 2.1962        | 1.9526         | 0.2436         | 1.752        | 0.0017        |
| Vamp3                | NM.009498          | 2.1184        | 1.86551        | 0.25289        | 1.79         | 0.0812        |
| Hnrpa0               | AK019388           | 3.069         | 2.90181        | 0.16719        | 1.469        | 0.001         |
| Zbtb12               | NM.198886          | 4.1052        | 3.9825         | 0.1227         | 1.326        | 0.0645        |
| <b>Paxip1</b>        | <b>NM.018878</b>   | <b>1.4839</b> | <b>1.09991</b> | <b>0.38399</b> | <b>2.42</b>  | <b>0.0199</b> |
| Sh3bp2               | NM.011893          | 2.5914        | 2.39321        | 0.19819        | 1.578        | 0.0236        |
| Map3k10              | XM.887283          | 3.5426        | 3.4005         | 0.1421         | 1.387        | 0.0073        |
| Gas2l3               | AK018456           | 2.6355        | 2.44181        | 0.19369        | 1.562        | 0.0374        |
| 2410081M15Rik        | NM.028603          | 3.025         | 2.85821        | 0.16679        | 1.468        | 0.0006        |
| Gabbr1               | BC054735           | 2.8551        | 2.6808         | 0.1743         | 1.493        | 0.0272        |
| Slc8a2               | NM.148946          | 2.2588        | 2.03411        | 0.22469        | 1.677        | 0.0006        |
| Ing3                 | NM.023626          | 2.5752        | 2.3815         | 0.1937         | 1.562        | 0.0009        |
| 6430526N21Rik        | NM.001033383       | 2.4639        | 2.2607         | 0.2032         | 1.596        | 0.0015        |
| Srebf2               | NM.033218          | 3.0197        | 2.85781        | 0.16189        | 1.451        | 0.0002        |
| Ube2b                | AK135056           | 2.3598        | 2.15171        | 0.20809        | 1.614        | 0             |





| Symbol               | Annotation      | Mean (S80A)   | Mean (WT)      | Log Ratio      | Fold Change  | FDR           |
|----------------------|-----------------|---------------|----------------|----------------|--------------|---------------|
| Lrriq2               | AK078361        | 1.7914        | 1.5851         | 0.2063         | 1.608        | 0.0958        |
| Kpna4                | NM.008467       | 1.82          | 1.6176         | 0.2024         | 1.593        | 0.0272        |
| Snf1lk               | NM.010831       | 2.6865        | 2.5556         | 0.1309         | 1.351        | 0.0362        |
| 0710001B24Rik        | NM.175118       | 2.6386        | 2.50531        | 0.13329        | 1.359        | 0.0322        |
| BC021831             | BC021831        | 1.8534        | 1.65831        | 0.19509        | 1.567        | 0.0304        |
| Cnr1                 | NM.007726       | 2.3633        | 2.2138         | 0.1495         | 1.41         | 0.0039        |
| AK044799             | AK044799        | 1.892         | 1.70171        | 0.19029        | 1.549        | 0.0077        |
| TC1440691            | TC1440691       | 2.4368        | 2.29251        | 0.14429        | 1.394        | 0.0051        |
| Calcoco1             | NM.026192       | 1.9762        | 1.79781        | 0.17839        | 1.507        | 0.024         |
| Rdh13                | AK089458        | 2.0336        | 1.86151        | 0.17209        | 1.486        | 0.0063        |
| Zbtb24               | AF263010        | 2.3131        | 2.1651         | 0.148          | 1.406        | 0.0088        |
| Arvcf                | NM.033474       | 2.904         | 2.78831        | 0.11569        | 1.305        | 0.0036        |
| AK037868             | AK037868        | 1.7816        | 1.5865         | 0.1951         | 1.567        | 0.0431        |
| Mapk8                | NM.016700       | 2.2339        | 2.0824         | 0.1515         | 1.417        | 0.0488        |
| Traf3ip2             | NM.134000       | 1.2189        | 0.9126         | 0.3063         | 2.024        | 0.0523        |
| AK016486             | AK016486        | 2.2479        | 2.09901        | 0.14889        | 1.408        | 0.0985        |
| Peg3                 | NM.008817       | 2.1974        | 2.046          | 0.1514         | 1.417        | 0.0292        |
| Tmem142c             | NM.198424       | 2.5943        | 2.4677         | 0.1266         | 1.338        | 0.06          |
| 2810449C10Rik        | AK039679        | 3.178         | 3.07561        | 0.10239        | 1.265        | 0.06          |
| Psmc2                | AK083989        | 2.0893        | 1.9308         | 0.1585         | 1.44         | 0.0806        |
| Mare                 | NM.181569       | 2.4599        | 2.3285         | 0.1314         | 1.353        | 0.0943        |
| Snx27                | AK147452        | 1.8533        | 1.67501        | 0.17829        | 1.507        | 0.0359        |
| <b>D030051J21Rik</b> | <b>AK083595</b> | <b>1.1949</b> | <b>0.8988</b>  | <b>0.2961</b>  | <b>1.977</b> | <b>0.0346</b> |
| Amdhd2               | AK078259        | 2.3977        | 2.2649         | 0.1328         | 1.357        | 0.0896        |
| Mirg                 | AK077315        | 2.2298        | 2.08701        | 0.14279        | 1.389        | 0.0837        |
| AK031010             | AK031010        | 2.1712        | 2.02431        | 0.14689        | 1.402        | 0.0819        |
| Mnab                 | NM.130233       | 2.9115        | 2.8037         | 0.1078         | 1.281        | 0.0679        |
| Chd1                 | NM.007690       | 2.1572        | 2.01           | 0.1472         | 1.403        | 0.0477        |
| Gsk3b                | NM.019827       | 2.3586        | 2.22501        | 0.13359        | 1.36         | 0.0127        |
| Snap25               | NM.011428       | 2.867         | 2.7598         | 0.1072         | 1.279        | 0.0807        |
| Lrrc57               | NM.025657       | 2.3637        | 2.2332         | 0.1305         | 1.35         | 0.0094        |
| TC1526069            | TC1526069       | 2.6199        | 2.5033         | 0.1166         | 1.307        | 0.0813        |
| Brunol5              | AK132321        | 1.7376        | 1.5584         | 0.1792         | 1.51         | 0.0686        |
| <b>AK081327</b>      | <b>AK081327</b> | <b>1.1614</b> | <b>0.87481</b> | <b>0.28659</b> | <b>1.934</b> | <b>0.0667</b> |
| Pdcd6ip              | NM.011052       | 1.8144        | 1.6479         | 0.1665         | 1.467        | 0.0937        |
| Stch                 | NM.030201       | 2.8925        | 2.7943         | 0.0982         | 1.253        | 0.024         |
| 6530418L21Rik        | NM.175398       | 2.3024        | 2.17911        | 0.12329        | 1.328        | 0.0649        |
| 6430704M03Rik        | AK078331        | 2.1056        | 1.97551        | 0.13009        | 1.349        | 0.0483        |
| Zfhx1b               | AK031541        | 2.104         | 1.9768         | 0.1272         | 1.34         | 0.0794        |
| L1cam                | NM.008478       | 2.1029        | 1.98311        | 0.11979        | 1.317        | 0.0806        |
| Cdyl2                | NM.029441       | 2.0069        | 1.8819         | 0.125          | 1.333        | 0.0918        |

The genes that are of low abundance (mean value < 1.7) are in bold. The mean value of wild-type and S80A is the logarithm of the raw reading to the base of 10. The raw reading can be calculated as  $10^{\text{mean value}}$ . The log ratio is the logarithm of the ratio of S80A versus wild-type to the base of 10. The fold change can be calculated as  $10^{\text{log ratio}}$ .

**Table S3. The lists of genes that are down-regulated in S80A samples compared with wild-type samples which may contain multiple probes targeting the same gene**

| Symbol                                                                                     | Annotation          | Mean (S80A)   | Mean (WT)      | Log ratio       | Fold change  | FDR           |
|--------------------------------------------------------------------------------------------|---------------------|---------------|----------------|-----------------|--------------|---------------|
| Genes that are down-regulated in S80A samples compared with wild-type samples (FDR < 0.05) |                     |               |                |                 |              |               |
| Gpr17                                                                                      | NM_001025381        | 2.1903        | 2.81159        | -0.62129        | 4.181        | 0.0022        |
| Anp32a                                                                                     | NM_009672           | 2.4009        | 2.96939        | -0.56849        | 3.702        | 0             |
| Defb37                                                                                     | NM_181683           | 2.2313        | 2.6084         | -0.3771         | 2.382        | 0             |
| Lgi4                                                                                       | NM_144556           | 1.6943        | 2.1524         | -0.4581         | 2.871        | 0             |
| Gstm1                                                                                      | NM_010358           | 3.6954        | 3.911          | -0.2156         | 1.642        | 0             |
| Cmtm5                                                                                      | NM_026066           | 2.1925        | 2.53209        | -0.33959        | 2.185        | 0             |
| Gstm3                                                                                      | NM_010359           | 3.1915        | 3.4114         | -0.2199         | 1.659        | 0.002         |
| Abhd3                                                                                      | NM_134130           | 1.6106        | 2.00629        | -0.39569        | 2.487        | 0             |
| Bcas1                                                                                      | NM_029815           | 1.8036        | 2.14449        | -0.34089        | 2.192        | 0.0003        |
| Cotl1                                                                                      | NM_028071           | 4.5576        | 4.6993         | -0.1417         | 1.385        | 0.0017        |
| Gstm1                                                                                      | NM_010358           | 2.1509        | 2.43199        | -0.28109        | 1.91         | 0.0006        |
| Pla2g7                                                                                     | NM_013737           | 2.3674        | 2.62489        | -0.25749        | 1.809        | 0             |
| Olfr1386                                                                                   | NM_001011741        | 1.3004        | 1.711          | -0.4106         | 2.573        | 0.0029        |
| Havcr2                                                                                     | NM_134250           | 1.6664        | 1.99589        | -0.32949        | 2.135        | 0.034         |
| <b>Rarres1</b>                                                                             | <b>XM_130987</b>    | <b>1.1222</b> | <b>1.54869</b> | <b>-0.42649</b> | <b>2.669</b> | <b>0.0073</b> |
| TC1414310                                                                                  | TC1414310           | 3.0491        | 3.22729        | -0.17819        | 1.507        | 0.0135        |
| Bdh2                                                                                       | NM_027208           | 1.3999        | 1.7527         | -0.3528         | 2.253        | 0.0002        |
| Bdh2                                                                                       | NM_027208           | 2.1042        | 2.34929        | -0.24509        | 1.758        | 0             |
| Padi2                                                                                      | NM_008812           | 1.4318        | 1.7685         | -0.3367         | 2.171        | 0.0053        |
| ENSMUST00000089796                                                                         | ENSMUST00000089796  | 1.6158        | 1.9189         | -0.3031         | 2.009        | 0.0073        |
| Cbx7                                                                                       | NM_144811           | 2.1293        | 2.35519        | -0.22589        | 1.682        | 0.0227        |
| Oas3                                                                                       | NM_145226           | 1.0631        | 1.4557         | -0.3926         | 2.469        | 0.0019        |
| Cldn10                                                                                     | NM_021386           | 1.6794        | 1.9516         | -0.2722         | 1.871        | 0.0244        |
| Aph1a                                                                                      | NM_146104           | 2.3135        | 2.51609        | -0.20259        | 1.594        | 0.0418        |
| <b>Slc36a3</b>                                                                             | <b>NM_172258</b>    | <b>0.9503</b> | <b>1.3624</b>  | <b>-0.4121</b>  | <b>2.582</b> | <b>0.0006</b> |
| <b>Fxyd1</b>                                                                               | <b>NM_019503</b>    | <b>1.0799</b> | <b>1.45259</b> | <b>-0.37269</b> | <b>2.358</b> | <b>0.015</b>  |
| AU042671                                                                                   | XM_132325           | 2.3868        | 2.57049        | -0.18369        | 1.526        | 0.0034        |
| AK047230                                                                                   | AK047230            | 1.6382        | 1.89399        | -0.25579        | 1.802        | 0.0048        |
| 1700018B24Rik                                                                              | NM_025493           | 1.9369        | 2.15569        | -0.21879        | 1.654        | 0.0002        |
| AV254721                                                                                   | AV254721            | 2.4569        | 2.62939        | -0.17249        | 1.487        | 0.0115        |
| Nik                                                                                        | NM_008702           | 3.1975        | 3.331          | -0.1335         | 1.359        | 0.007         |
| Arts1                                                                                      | NM_030711           | 1.4373        | 1.71249        | -0.27519        | 1.884        | 0.0119        |
| Zcchc11                                                                                    | NM_175472           | 1.5366        | 1.7927         | -0.2561         | 1.803        | 0.0045        |
| TC1463322                                                                                  | TC1463322           | 2.7406        | 2.89009        | -0.14949        | 1.41         | 0.0472        |
| Ncoa6                                                                                      | NM_019825           | 2.1324        | 2.31899        | -0.18659        | 1.536        | 0.0002        |
| Mbp                                                                                        | NM_010777           | 1.4774        | 1.7349         | -0.2575         | 1.809        | 0.0169        |
| 6330500D04Rik                                                                              | AK134538            | 2.4638        | 2.62469        | -0.16089        | 1.448        | 0.0106        |
| Prdm16                                                                                     | NM_027504           | 1.8106        | 2.02079        | -0.21019        | 1.622        | 0.0071        |
| Slc30a1                                                                                    | NM_009579           | 2.7928        | 2.93309        | -0.14029        | 1.381        | 0.0151        |
| 4930467M19Rik                                                                              | AK015524            | 2.2105        | 2.3852         | -0.1747         | 1.495        | 0.0241        |
| A_51_P462771                                                                               | A_51_P462771        | 1.9967        | 2.1867         | -0.19           | 1.548        | 0.0407        |
| <b>AK034829</b>                                                                            | <b>AK034829</b>     | <b>0.9013</b> | <b>1.2654</b>  | <b>-0.3641</b>  | <b>2.312</b> | <b>0.0458</b> |
| Nav1                                                                                       | NM_173437           | 1.9589        | 2.14809        | -0.18919        | 1.545        | 0.0037        |
| Ntsr2                                                                                      | NM_008747           | 1.4703        | 1.7141         | -0.2438         | 1.753        | 0.0207        |
| cf7l2                                                                                      | NM_009333           | 2.602         | 2.7445         | -0.1425         | 1.388        | 0.0231        |
| D230040A04Rik                                                                              | AK039302            | 2.1293        | 2.30119        | -0.17189        | 1.485        | 0.0145        |
| Itgb8                                                                                      | XM_901358           | 1.7782        | 1.979          | -0.2008         | 1.587        | 0.0345        |
| <b>AK040092</b>                                                                            | <b>AK040092</b>     | <b>0.8551</b> | <b>1.21639</b> | <b>-0.36129</b> | <b>2.297</b> | <b>0.0469</b> |
| Srgap3                                                                                     | NM_080448           | 1.5344        | 1.76099        | -0.22659        | 1.684        | 0.0492        |
| Eaf2                                                                                       | NM_134111           | 2.1012        | 2.26189        | -0.16069        | 1.447        | 0.0271        |
| 1500015O10Rik                                                                              | NM_024283           | 3.1684        | 3.27669        | -0.10829        | 1.283        | 0.0249        |
| <b>MGC54654</b>                                                                            | <b>NM_001004170</b> | <b>0.8774</b> | <b>1.20019</b> | <b>-0.32279</b> | <b>2.102</b> | <b>0.0211</b> |
| Pacrg                                                                                      | NM_027032           | 2.1533        | 2.30289        | -0.14959        | 1.411        | 0.0042        |
| S100b                                                                                      | NM_009115           | 1.9033        | 2.0695         | -0.1662         | 1.466        | 0.0444        |
| Dhrs8                                                                                      | NM_053262           | 2.3883        | 2.52249        | -0.13419        | 1.362        | 0.0062        |
| <b>1700054F22Rik</b>                                                                       | <b>XM_485380</b>    | <b>1.0183</b> | <b>1.29889</b> | <b>-0.28059</b> | <b>1.908</b> | <b>0.0322</b> |
| 1700007K13Rik                                                                              | BC099566            | 2.3705        | 2.493          | -0.1225         | 1.325        | 0.0122        |
| 4933412F11Rik                                                                              | AK016790            | 1.8727        | 2.02099        | -0.14829        | 1.406        | 0.0109        |
| Eif2ak1                                                                                    | AK032508            | 2.7966        | 2.8953         | -0.0987         | 1.255        | 0.027         |



| Symbol                                                                                    | Annotation         | Mean (S80A)   | Mean (WT)      | Log ratio       | Fold change  | FDR           |
|-------------------------------------------------------------------------------------------|--------------------|---------------|----------------|-----------------|--------------|---------------|
| Genes that are down-regulated in S80A samples compared with wild-type samples (FDR < 0.1) |                    |               |                |                 |              |               |
| Gpr17                                                                                     | NM_001025381       | 2.1903        | 2.81159        | -0.62129        | 4.181        | 0.0022        |
| Anp32a                                                                                    | NM_009672          | 2.4009        | 2.96939        | -0.56849        | 3.702        | 0             |
| Defb37                                                                                    | NM_181683          | 2.2313        | 2.6084         | -0.3771         | 2.382        | 0             |
| Lgi4                                                                                      | NM_144556          | 1.6943        | 2.1524         | -0.4581         | 2.871        | 0             |
| Gstm1                                                                                     | NM_010358          | 3.6954        | 3.911          | -0.2156         | 1.642        | 0             |
| Cmtm5                                                                                     | NM_026066          | 2.1925        | 2.53209        | -0.33959        | 2.185        | 0             |
| Apoe                                                                                      | NM_009696          | 3.9569        | 4.1444         | -0.1875         | 1.539        | 0.0942        |
| Gstm3                                                                                     | NM_010359          | 3.1915        | 3.4114         | -0.2199         | 1.659        | 0.002         |
| Abhd3                                                                                     | NM_134130          | 1.6106        | 2.00629        | -0.39569        | 2.487        | 0             |
| Bcas1                                                                                     | NM_029815          | 1.8036        | 2.14449        | -0.34089        | 2.192        | 0.0003        |
| Cotl1                                                                                     | NM_028071          | 4.5576        | 4.6993         | -0.1417         | 1.385        | 0.0017        |
| Gstm1                                                                                     | NM_010358          | 2.1509        | 2.43199        | -0.28109        | 1.91         | 0.0006        |
| Pla2g7                                                                                    | NM_013737          | 2.3674        | 2.62489        | -0.25749        | 1.809        | 0             |
| Olfr1386                                                                                  | NM_001011741       | 1.3004        | 1.711          | -0.4106         | 2.573        | 0.0029        |
| Havcr2                                                                                    | NM_134250          | 1.6664        | 1.99589        | -0.32949        | 2.135        | 0.034         |
| Rarres1                                                                                   | XM_130987          | 1.1222        | 1.54869        | -0.42649        | 2.669        | 0.0073        |
| Masp2                                                                                     | NM_001003893       | 1.1636        | 1.5778         | -0.4142         | 2.595        | 0.056         |
| Mt2                                                                                       | NM_008630          | 4.187         | 4.32029        | -0.13329        | 1.359        | 0.0715        |
| TC1414310                                                                                 | TC1414310          | 3.0491        | 3.22729        | -0.17819        | 1.507        | 0.0135        |
| Bdh2                                                                                      | NM_027208          | 1.3999        | 1.7527         | -0.3528         | 2.253        | 0.0002        |
| Bdh2                                                                                      | NM_027208          | 2.1042        | 2.34929        | -0.24509        | 1.758        | 0             |
| Padi2                                                                                     | NM_008812          | 1.4318        | 1.7685         | -0.3367         | 2.171        | 0.0053        |
| ENSMUST00000089796                                                                        | ENSMUST00000089796 | 1.6158        | 1.9189         | -0.3031         | 2.009        | 0.0073        |
| Cbx7                                                                                      | NM_144811          | 2.1293        | 2.35519        | -0.22589        | 1.682        | 0.0227        |
| Oas3                                                                                      | <b>NM_145226</b>   | <b>1.0631</b> | <b>1.4557</b>  | <b>-0.3926</b>  | <b>2.469</b> | <b>0.0019</b> |
| Cldn10                                                                                    | NM_021386          | 1.6794        | 1.9516         | -0.2722         | 1.871        | 0.0244        |
| Aph1a                                                                                     | NM_146104          | 2.3135        | 2.51609        | -0.20259        | 1.594        | 0.0418        |
| Spn                                                                                       | <b>NM_009259</b>   | <b>0.9043</b> | <b>1.33759</b> | <b>-0.43329</b> | <b>2.712</b> | <b>0.0865</b> |
| Slc36a3                                                                                   | <b>NM_172258</b>   | <b>0.9503</b> | <b>1.3624</b>  | <b>-0.4121</b>  | <b>2.582</b> | <b>0.0006</b> |
| Fxyd1                                                                                     | <b>NM_019503</b>   | <b>1.0799</b> | <b>1.45259</b> | <b>-0.37269</b> | <b>2.358</b> | <b>0.015</b>  |
| Snrpd3                                                                                    | NM_026095          | 4.0178        | 4.13009        | -0.11229        | 1.295        | 0.0911        |
| AU042671                                                                                  | XM_132325          | 2.3868        | 2.57049        | -0.18369        | 1.526        | 0.0034        |
| AK047230                                                                                  | AK047230           | 1.6382        | 1.89399        | -0.25579        | 1.802        | 0.0048        |
| 1700018B24Rik                                                                             | NM_025493          | 1.9369        | 2.15569        | -0.21879        | 1.654        | 0.0002        |
| <b>AK090167</b>                                                                           | <b>AK090167</b>    | <b>0.9263</b> | <b>1.3238</b>  | <b>-0.3975</b>  | <b>2.497</b> | <b>0.0543</b> |
| AV254721                                                                                  | AV254721           | 2.4569        | 2.62939        | -0.17249        | 1.487        | 0.0115        |
| Nik                                                                                       | NM_008702          | 3.1975        | 3.331          | -0.1335         | 1.359        | 0.007         |
| Arts1                                                                                     | NM_030711          | 1.4373        | 1.71249        | -0.27519        | 1.884        | 0.0119        |
| Aig1                                                                                      | NM_025446          | 1.6901        | 1.926          | -0.2359         | 1.721        | 0.0539        |
| Zcchc11                                                                                   | NM_175472          | 1.5366        | 1.7927         | -0.2561         | 1.803        | 0.0045        |
| TC1463322                                                                                 | TC1463322          | 2.7406        | 2.89009        | -0.14949        | 1.41         | 0.0472        |
| 6430510M02Rik                                                                             | NM_176932          | 2.4185        | 2.5846         | -0.1661         | 1.465        | 0.094         |
| Ncoa6                                                                                     | NM_019825          | 2.1324        | 2.31899        | -0.18659        | 1.536        | 0.0002        |
| Mbp                                                                                       | NM_010777          | 1.4774        | 1.7349         | -0.2575         | 1.809        | 0.0169        |
| 6330500D04Rik                                                                             | AK134538           | 2.4638        | 2.62469        | -0.16089        | 1.448        | 0.0106        |
| Prdm16                                                                                    | NM_027504          | 1.8106        | 2.02079        | -0.21019        | 1.622        | 0.0071        |
| Slc30a1                                                                                   | NM_009579          | 2.7928        | 2.93309        | -0.14029        | 1.381        | 0.0151        |
| 4930467M19Rik                                                                             | AK015524           | 2.2105        | 2.3852         | -0.1747         | 1.495        | 0.0241        |
| A_51_P462771                                                                              | A_51_P462771       | 1.9967        | 2.1867         | -0.19           | 1.548        | 0.0407        |
| <b>AK034829</b>                                                                           | <b>AK034829</b>    | <b>0.9013</b> | <b>1.2654</b>  | <b>-0.3641</b>  | <b>2.312</b> | <b>0.0458</b> |
| Nav1                                                                                      | NM_173437          | 1.9589        | 2.14809        | -0.18919        | 1.545        | 0.0037        |
| Ntsr2                                                                                     | NM_008747          | 1.4703        | 1.7141         | -0.2438         | 1.753        | 0.0207        |
| Olfr1198                                                                                  | NM_207567          | 2.1738        | 2.34379        | -0.16999        | 1.479        | 0.0759        |
| Tcf7l2                                                                                    | NM_009333          | 2.602         | 2.7445         | -0.1425         | 1.388        | 0.0231        |
| D230040A04Rik                                                                             | AK039302           | 2.1293        | 2.30119        | -0.17189        | 1.485        | 0.0145        |
| TC1521782                                                                                 | TC1521782          | 1.6203        | 1.84           | -0.2197         | 1.658        | 0.0837        |
| Itgb8                                                                                     | XM_901358          | 1.7782        | 1.979          | -0.2008         | 1.587        | 0.0345        |
| <b>AK040092</b>                                                                           | <b>AK040092</b>    | <b>0.8551</b> | <b>1.21639</b> | <b>-0.36129</b> | <b>2.297</b> | <b>0.0469</b> |
| Srgap3                                                                                    | NM_080448          | 1.5344        | 1.76099        | -0.22659        | 1.684        | 0.0492        |
| Bhlhb5                                                                                    | NM_021560          | 3.9633        | 4.0561         | -0.0928         | 1.238        | 0.0884        |
| Unkl                                                                                      | AK054549           | 1.7797        | 1.97349        | -0.19379        | 1.562        | 0.074         |
| BC018371                                                                                  | NM_153807          | 2.8444        | 2.9691         | -0.1247         | 1.332        | 0.0937        |
| AK082760                                                                                  | AK082760           | 1.5209        | 1.739          | -0.2181         | 1.652        | 0.0808        |

| Symbol               | Annotation       | Mean (S80A)   | Mean (WT)      | Log ratio       | Fold change  | FDR           |
|----------------------|------------------|---------------|----------------|-----------------|--------------|---------------|
| Eaf2                 | NM_134111        | 2.1012        | 2.26189        | -0.16069        | 1.447        | 0.0271        |
| Mgll                 | NM_011844        | 2.8803        | 2.99939        | -0.11909        | 1.315        | 0.0624        |
| 1500015O10Rik        | NM_024283        | 3.1684        | 3.27669        | -0.10829        | 1.283        | 0.0249        |
| <b>BC089491</b>      | <b>NM_175033</b> | <b>1.4002</b> | <b>1.6305</b>  | <b>-0.2303</b>  | <b>1.699</b> | <b>0.0531</b> |
| C630050I24Rik        | AK021281         | 2.2972        | 2.4403         | -0.1431         | 1.39         | 0.0797        |
| Lims2                | NM_144862        | 2.1005        | 2.2548         | -0.1543         | 1.426        | 0.0719        |
| MGC54654             | NM_001004170     | 0.8774        | 1.20019        | -0.32279        | 2.102        | 0.0211        |
| Pacrg                | NM_027032        | 2.1533        | 2.30289        | -0.14959        | 1.411        | 0.0042        |
| S100b                | NM_009115        | 1.9033        | 2.0695         | -0.1662         | 1.466        | 0.0444        |
| Dhrs8                | NM_053262        | 2.3883        | 2.52249        | -0.13419        | 1.362        | 0.0062        |
| <b>1700054F22Rik</b> | <b>XM_485380</b> | <b>1.0183</b> | <b>1.29889</b> | <b>-0.28059</b> | <b>1.908</b> | <b>0.0322</b> |
| <b>Pglyrp1</b>       | <b>NM_009402</b> | <b>0.8433</b> | <b>1.1568</b>  | <b>-0.3135</b>  | <b>2.058</b> | <b>0.0546</b> |
| <b>Cryaa</b>         | <b>NM_013501</b> | <b>0.9208</b> | <b>1.2132</b>  | <b>-0.2924</b>  | <b>1.96</b>  | <b>0.0957</b> |
| 1700007K13Rik        | BC099566         | 2.3705        | 2.493          | -0.1225         | 1.325        | 0.0122        |
| 4933412F11Rik        | AK016790         | 1.8727        | 2.02099        | -0.14829        | 1.406        | 0.0109        |
| Kifc1                | NM_053173        | 2.8607        | 2.95869        | -0.09799        | 1.253        | 0.0619        |
| <b>4931406H21Rik</b> | <b>NM_175264</b> | <b>1.0323</b> | <b>1.2782</b>  | <b>-0.2459</b>  | <b>1.761</b> | <b>0.0783</b> |
| Eif2ak1              | AK032508         | 2.7966        | 2.8953         | -0.0987         | 1.255        | 0.027         |
| <b>Ttc22</b>         | <b>NM_177667</b> | <b>0.8526</b> | <b>1.1045</b>  | <b>-0.2519</b>  | <b>1.786</b> | <b>0.0542</b> |

The genes that are of low abundance (mean value < 1.7) are in bold. The mean value of wild-type and S80A is the logarithm of the raw reading to the base of 10. The raw reading can be calculated as  $10^{\text{mean value}}$ . The log ratio is the logarithm of the ratio of S80A versus wild-type to the base of 10. The fold change can be calculated as  $10^{\text{log ratio}}$ .
